# Supplementary material
Source: publisher figshare collection journal article supplement (https://gsapubs.figshare.com/ndownloader/files/23306579)
Supplement: Supplementary file 1 [file 23306579]

Archive with 4 entries (4 files):
- Appendix DR3 R Script.docx
- 2018011 Supplementary Tables and Figures.pdf
- Appendix DR1-dataSummaryTable.csv.xlsx
- Appendix DR2-dataPosteriorDistributions.csv.xlsx
