# Supplementary material
Source: publisher figshare collection journal article supplement (https://gsapubs.figshare.com/ndownloader/files/23306579)
Supplement: Supplementary file 1 [file 23306579 › Appendix DR2-dataPosteriorDistributions.csv.xlsx]

## Sheet: Appendix2-dataPosteriorDistribu
#	GSA Data Repository 2018011
#	Kowalewski et al., 2018, One fossil record, multiple time resolutions: Disparate time-averaging of echinoids and mollusks on a Holocene carbonate platform: Geology, https://doi.org/10.1130/G39789.1
#
#
#	Calibration posteriors for 60 specimens used in these analyses.
#
#
#	Columns:
#	: row number
#	Specimen: unique sample identifier
#	Age: calibrated age (relative to 2016AD, the year of collection)
#	Probability: the posterior probability for that age.
#	Taxon: "Leodia" or "Tucetona"
#
#
#
#
#
#
#
,"Specimen","Age","Probability","Taxon"
4,"13631;10",54,6.68e-07,"Leodia"
5,"13631;10",53.5,0.011026,"Leodia"
6,"13631;10",53,0.13537,"Leodia"
7,"13631;10",52.5,0.08914,"Leodia"
8,"13631;10",52,0.0005129,"Leodia"
60,"13631;10",26,2.23e-07,"Leodia"
61,"13631;10",25.5,1.4692e-05,"Leodia"
62,"13631;10",25,0.00025778,"Leodia"
63,"13631;10",24.5,0.001351,"Leodia"
64,"13631;10",24,0.003195,"Leodia"
65,"13631;10",23.5,0.004147,"Leodia"
66,"13631;10",23,0.0031553,"Leodia"
67,"13631;10",22.5,0.0014283,"Leodia"
68,"13631;10",22,0.000364,"Leodia"
69,"13631;10",21.5,6.166e-05,"Leodia"
70,"13631;10",21,1.4692e-05,"Leodia"
71,"13631;10",20.5,1.5583e-05,"Leodia"
72,"13631;10",20,4.586e-05,"Leodia"
73,"13631;10",19.5,0.00013179,"Leodia"
74,"13631;10",19,0.0003662,"Leodia"
75,"13631;10",18.5,0.0009708,"Leodia"
76,"13631;10",18,0.0024283,"Leodia"
77,"13631;10",17.5,0.005677,"Leodia"
78,"13631;10",17,0.012305,"Leodia"
79,"13631;10",16.5,0.024569,"Leodia"
80,"13631;10",16,0.04495,"Leodia"
81,"13631;10",15.5,0.07503,"Leodia"
82,"13631;10",15,0.11385,"Leodia"
83,"13631;10",14.5,0.15666,"Leodia"
84,"13631;10",14,0.19505,"Leodia"
85,"13631;10",13.5,0.21938,"Leodia"
86,"13631;10",13,0.22261,"Leodia"
87,"13631;10",12.5,0.2036,"Leodia"
88,"13631;10",12,0.1677,"Leodia"
89,"13631;10",11.5,0.12429,"Leodia"
90,"13631;10",11,0.08282,"Leodia"
91,"13631;10",10.5,0.04956,"Leodia"
92,"13631;10",10,0.026602,"Leodia"
93,"13631;10",9.5,0.012783,"Leodia"
94,"13631;10",9,0.005485,"Leodia"
95,"13631;10",8.5,0.0020952,"Leodia"
96,"13631;10",8,0.0007095,"Leodia"
97,"13631;10",7.5,0.0002117,"Leodia"
98,"13631;10",7,5.543e-05,"Leodia"
99,"13631;10",6.5,1.2689e-05,"Leodia"
100,"13631;10",6,2.4487e-06,"Leodia"
101,"13631;10",5.5,4.45e-07,"Leodia"
108,"13631;12",54,1.4789e-05,"Leodia"
109,"13631;12",53.5,0.019911,"Leodia"
110,"13631;12",53,0.12385,"Leodia"
111,"13631;12",52.5,0.08795,"Leodia"
112,"13631;12",52,0.0018368,"Leodia"
113,"13631;12",51.5,6.96e-07,"Leodia"
163,"13631;12",26.5,1.74e-07,"Leodia"
164,"13631;12",26,4.524e-06,"Leodia"
165,"13631;12",25.5,8.752e-05,"Leodia"
166,"13631;12",25,0.0006761,"Leodia"
167,"13631;12",24.5,0.0023991,"Leodia"
168,"13631;12",24,0.004797,"Leodia"
169,"13631;12",23.5,0.006056,"Leodia"
170,"13631;12",23,0.005104,"Leodia"
171,"13631;12",22.5,0.003037,"Leodia"
172,"13631;12",22,0.0013338,"Leodia"
173,"13631;12",21.5,0.0005298,"Leodia"
174,"13631;12",21,0.00029822,"Leodia"
175,"13631;12",20.5,0.0003814,"Leodia"
176,"13631;12",20,0.000793,"Leodia"
177,"13631;12",19.5,0.0016,"Leodia"
178,"13631;12",19,0.0031144,"Leodia"
179,"13631;12",18.5,0.005819,"Leodia"
180,"13631;12",18,0.010393,"Leodia"
181,"13631;12",17.5,0.017689,"Leodia"
182,"13631;12",17,0.028609,"Leodia"
183,"13631;12",16.5,0.04387,"Leodia"
184,"13631;12",16,0.06368,"Leodia"
185,"13631;12",15.5,0.08733,"Leodia"
186,"13631;12",15,0.11305,"Leodia"
187,"13631;12",14.5,0.13794,"Leodia"
188,"13631;12",14,0.15848,"Leodia"
189,"13631;12",13.5,0.1713,"Leodia"
190,"13631;12",13,0.17399,"Leodia"
191,"13631;12",12.5,0.16591,"Leodia"
192,"13631;12",12,0.14837,"Leodia"
193,"13631;12",11.5,0.12429,"Leodia"
194,"13631;12",11,0.0974,"Leodia"
195,"13631;12",10.5,0.07131,"Leodia"
196,"13631;12",10,0.04868,"Leodia"
197,"13631;12",9.5,0.03094,"Leodia"
198,"13631;12",9,0.018261,"Leodia"
199,"13631;12",8.5,0.009982,"Leodia"
200,"13631;12",8,0.005038,"Leodia"
201,"13631;12",7.5,0.0023388,"Leodia"
202,"13631;12",7,0.0009943,"Leodia"
203,"13631;12",6.5,0.000385,"Leodia"
204,"13631;12",6,0.00013502,"Leodia"
205,"13631;12",5.5,4.263e-05,"Leodia"
206,"13631;12",5,1.2005e-05,"Leodia"
207,"13631;12",4.5,2.9578e-06,"Leodia"
208,"13631;12",4,6.96e-07,"Leodia"
209,"13631;12",3.5,1.74e-07,"Leodia"
215,"13631;14",54,1.3394e-05,"Leodia"
216,"13631;14",53.5,0.04732,"Leodia"
217,"13631;14",53,0.17249,"Leodia"
218,"13631;14",52.5,0.028613,"Leodia"
219,"13631;14",52,2.1048e-05,"Leodia"
272,"13631;14",25.5,4.78e-07,"Leodia"
273,"13631;14",25,2.1288e-05,"Leodia"
274,"13631;14",24.5,0.000199,"Leodia"
275,"13631;14",24,0.0006259,"Leodia"
276,"13631;14",23.5,0.0008427,"Leodia"
277,"13631;14",23,0.0005142,"Leodia"
278,"13631;14",22.5,0.00014088,"Leodia"
279,"13631;14",22,1.5308e-05,"Leodia"
280,"13631;14",21.5,7.18e-07,"Leodia"
283,"13631;14",20,2.39e-07,"Leodia"
284,"13631;14",19.5,7.18e-07,"Leodia"
285,"13631;14",19,2.3919e-06,"Leodia"
286,"13631;14",18.5,9.328e-06,"Leodia"
287,"13631;14",18,3.373e-05,"Leodia"
288,"13631;14",17.5,0.00011577,"Leodia"
289,"13631;14",17,0.0003727,"Leodia"
290,"13631;14",16.5,0.0011105,"Leodia"
291,"13631;14",16,0.0030389,"Leodia"
292,"13631;14",15.5,0.007581,"Leodia"
293,"13631;14",15,0.017132,"Leodia"
294,"13631;14",14.5,0.03491,"Leodia"
295,"13631;14",14,0.06388,"Leodia"
296,"13631;14",13.5,0.10465,"Leodia"
297,"13631;14",13,0.15311,"Leodia"
298,"13631;14",12.5,0.19967,"Leodia"
299,"13631;14",12,0.23177,"Leodia"
300,"13631;14",11.5,0.23919,"Leodia"
301,"13631;14",11,0.21923,"Leodia"
302,"13631;14",10.5,0.17828,"Leodia"
303,"13631;14",10,0.1285,"Leodia"
304,"13631;14",9.5,0.08196,"Leodia"
305,"13631;14",9,0.04618,"Leodia"
306,"13631;14",8.5,0.022922,"Leodia"
307,"13631;14",8,0.009989,"Leodia"
308,"13631;14",7.5,0.003804,"Leodia"
309,"13631;14",7,0.0012586,"Leodia"
310,"13631;14",6.5,0.0003593,"Leodia"
311,"13631;14",6,8.754e-05,"Leodia"
312,"13631;14",5.5,1.7939e-05,"Leodia"
313,"13631;14",5,3.1094e-06,"Leodia"
314,"13631;14",4.5,4.78e-07,"Leodia"
321,"13631;15 ave",54,0.000842,"Leodia"
322,"13631;15 ave",53.5,0.1226,"Leodia"
323,"13631;15 ave",53,0.11796,"Leodia"
324,"13631;15 ave",52.5,0.008881,"Leodia"
325,"13631;15 ave",52,5.397e-06,"Leodia"
378,"13631;15 ave",25.5,2.08e-07,"Leodia"
379,"13631;15 ave",25,5.397e-06,"Leodia"
380,"13631;15 ave",24.5,5.543e-05,"Leodia"
381,"13631;15 ave",24,0.00018912,"Leodia"
382,"13631;15 ave",23.5,0.00025637,"Leodia"
383,"13631;15 ave",23,0.00014531,"Leodia"
384,"13631;15 ave",22.5,3.612e-05,"Leodia"
385,"13631;15 ave",22,3.944e-06,"Leodia"
386,"13631;15 ave",21.5,2.08e-07,"Leodia"
389,"13631;15 ave",20,2.08e-07,"Leodia"
390,"13631;15 ave",19.5,4.15e-07,"Leodia"
391,"13631;15 ave",19,1.2455e-06,"Leodia"
392,"13631;15 ave",18.5,3.737e-06,"Leodia"
393,"13631;15 ave",18,1.1833e-05,"Leodia"
394,"13631;15 ave",17.5,3.55e-05,"Leodia"
395,"13631;15 ave",17,0.00010193,"Leodia"
396,"13631;15 ave",16.5,0.00027776,"Leodia"
397,"13631;15 ave",16,0.0007152,"Leodia"
398,"13631;15 ave",15.5,0.0017299,"Leodia"
399,"13631;15 ave",15,0.003916,"Leodia"
400,"13631;15 ave",14.5,0.00827,"Leodia"
401,"13631;15 ave",14,0.016246,"Leodia"
402,"13631;15 ave",13.5,0.029612,"Leodia"
403,"13631;15 ave",13,0.04998,"Leodia"
404,"13631;15 ave",12.5,0.07794,"Leodia"
405,"13631;15 ave",12,0.11213,"Leodia"
406,"13631;15 ave",11.5,0.14858,"Leodia"
407,"13631;15 ave",11,0.18102,"Leodia"
408,"13631;15 ave",10.5,0.20248,"Leodia"
409,"13631;15 ave",10,0.20759,"Leodia"
410,"13631;15 ave",9.5,0.19472,"Leodia"
411,"13631;15 ave",9,0.16677,"Leodia"
412,"13631;15 ave",8.5,0.13011,"Leodia"
413,"13631;15 ave",8,0.09222,"Leodia"
414,"13631;15 ave",7.5,0.05917,"Leodia"
415,"13631;15 ave",7,0.03424,"Leodia"
416,"13631;15 ave",6.5,0.017781,"Leodia"
417,"13631;15 ave",6,0.008239,"Leodia"
418,"13631;15 ave",5.5,0.003382,"Leodia"
419,"13631;15 ave",5,0.0012204,"Leodia"
420,"13631;15 ave",4.5,0.0003832,"Leodia"
421,"13631;15 ave",4,0.00010338,"Leodia"
422,"13631;15 ave",3.5,2.3665e-05,"Leodia"
423,"13631;15 ave",3,4.567e-06,"Leodia"
424,"13631;15 ave",2.5,6.23e-07,"Leodia"
432,"13631;16",54,3.629e-05,"Leodia"
433,"13631;16",53.5,0.06797,"Leodia"
434,"13631;16",53,0.16459,"Leodia"
435,"13631;16",52.5,0.018044,"Leodia"
436,"13631;16",52,7.691e-06,"Leodia"
489,"13631;16",25.5,2.4e-07,"Leodia"
490,"13631;16",25,9.854e-06,"Leodia"
491,"13631;16",24.5,0.00010791,"Leodia"
492,"13631;16",24,0.0003684,"Leodia"
493,"13631;16",23.5,0.0005001,"Leodia"
494,"13631;16",23,0.00028456,"Leodia"
495,"13631;16",22.5,6.681e-05,"Leodia"
496,"13631;16",22,5.768e-06,"Leodia"
497,"13631;16",21.5,2.4e-07,"Leodia"
501,"13631;16",19.5,2.4e-07,"Leodia"
502,"13631;16",19,4.81e-07,"Leodia"
503,"13631;16",18.5,2.1631e-06,"Leodia"
504,"13631;16",18,8.172e-06,"Leodia"
505,"13631;16",17.5,3.1004e-05,"Leodia"
506,"13631;16",17,0.00010984,"Leodia"
507,"13631;16",16.5,0.0003615,"Leodia"
508,"13631;16",16,0.0010976,"Leodia"
509,"13631;16",15.5,0.0030468,"Leodia"
510,"13631;16",15,0.007678,"Leodia"
511,"13631;16",14.5,0.017475,"Leodia"
512,"13631;16",14,0.03576,"Leodia"
513,"13631;16",13.5,0.06554,"Leodia"
514,"13631;16",13,0.10731,"Leodia"
515,"13631;16",12.5,0.15661,"Leodia"
516,"13631;16",12,0.20338,"Leodia"
517,"13631;16",11.5,0.23468,"Leodia"
518,"13631;16",11,0.24034,"Leodia"
519,"13631;16",10.5,0.21822,"Leodia"
520,"13631;16",10,0.17546,"Leodia"
521,"13631;16",9.5,0.12476,"Leodia"
522,"13631;16",9,0.0783,"Leodia"
523,"13631;16",8.5,0.04327,"Leodia"
524,"13631;16",8,0.02099,"Leodia"
525,"13631;16",7.5,0.008898,"Leodia"
526,"13631;16",7,0.003278,"Leodia"
527,"13631;16",6.5,0.0010426,"Leodia"
528,"13631;16",6,0.0002836,"Leodia"
529,"13631;16",5.5,6.537e-05,"Leodia"
530,"13631;16",5,1.2498e-05,"Leodia"
531,"13631;16",4.5,1.9227e-06,"Leodia"
532,"13631;16",4,2.4e-07,"Leodia"
539,"13631;19",54,5.408e-05,"Leodia"
540,"13631;19",53.5,0.05821,"Leodia"
541,"13631;19",53,0.1605,"Leodia"
542,"13631;19",52.5,0.02945,"Leodia"
543,"13631;19",52,4.467e-05,"Leodia"
596,"13631;19",25.5,1.0687e-06,"Leodia"
597,"13631;19",25,3.27e-05,"Leodia"
598,"13631;19",24.5,0.00024859,"Leodia"
599,"13631;19",24,0.0007205,"Leodia"
600,"13631;19",23.5,0.000961,"Leodia"
601,"13631;19",23,0.0006237,"Leodia"
602,"13631;19",22.5,0.00020284,"Leodia"
603,"13631;19",22,3.206e-05,"Leodia"
604,"13631;19",21.5,3.206e-06,"Leodia"
605,"13631;19",21,6.41e-07,"Leodia"
606,"13631;19",20.5,4.28e-07,"Leodia"
607,"13631;19",20,1.71e-06,"Leodia"
608,"13631;19",19.5,5.13e-06,"Leodia"
609,"13631;19",19,1.6031e-05,"Leodia"
610,"13631;19",18.5,4.809e-05,"Leodia"
611,"13631;19",18,0.00013872,"Leodia"
612,"13631;19",17.5,0.0003803,"Leodia"
613,"13631;19",17,0.0009847,"Leodia"
614,"13631;19",16.5,0.0023918,"Leodia"
615,"13631;19",16,0.005419,"Leodia"
616,"13631;19",15.5,0.0114,"Leodia"
617,"13631;19",15,0.022184,"Leodia"
618,"13631;19",14.5,0.03981,"Leodia"
619,"13631;19",14,0.06569,"Leodia"
620,"13631;19",13.5,0.09948,"Leodia"
621,"13631;19",13,0.13795,"Leodia"
622,"13631;19",12.5,0.17493,"Leodia"
623,"13631;19",12,0.20251,"Leodia"
624,"13631;19",11.5,0.21375,"Leodia"
625,"13631;19",11,0.20542,"Leodia"
626,"13631;19",10.5,0.1795,"Leodia"
627,"13631;19",10,0.1424,"Leodia"
628,"13631;19",9.5,0.10238,"Leodia"
629,"13631;19",9,0.06656,"Leodia"
630,"13631;19",8.5,0.03902,"Leodia"
631,"13631;19",8,0.020568,"Leodia"
632,"13631;19",7.5,0.009706,"Leodia"
633,"13631;19",7,0.004081,"Leodia"
634,"13631;19",6.5,0.0015193,"Leodia"
635,"13631;19",6,0.0004972,"Leodia"
636,"13631;19",5.5,0.00014171,"Leodia"
637,"13631;19",5,3.484e-05,"Leodia"
638,"13631;19",4.5,7.267e-06,"Leodia"
639,"13631;19",4,1.2825e-06,"Leodia"
640,"13631;19",3.5,2.14e-07,"Leodia"
646,"13631;20",54,1.7069e-06,"Leodia"
647,"13631;20",53.5,0.023051,"Leodia"
648,"13631;20",53,0.16914,"Leodia"
649,"13631;20",52.5,0.05145,"Leodia"
650,"13631;20",52,7.193e-05,"Leodia"
703,"13631;20",25.5,1.7069e-06,"Leodia"
704,"13631;20",25,5.779e-05,"Leodia"
705,"13631;20",24.5,0.0004479,"Leodia"
706,"13631;20",24,0.0012743,"Leodia"
707,"13631;20",23.5,0.0016959,"Leodia"
708,"13631;20",23,0.0011244,"Leodia"
709,"13631;20",22.5,0.000367,"Leodia"
710,"13631;20",22,5.17e-05,"Leodia"
711,"13631;20",21.5,3.658e-06,"Leodia"
712,"13631;20",21,2.44e-07,"Leodia"
713,"13631;20",20.5,2.44e-07,"Leodia"
714,"13631;20",20,9.75e-07,"Leodia"
715,"13631;20",19.5,3.658e-06,"Leodia"
716,"13631;20",19,1.3412e-05,"Leodia"
717,"13631;20",18.5,4.779e-05,"Leodia"
718,"13631;20",18,0.00016191,"Leodia"
719,"13631;20",17.5,0.0005148,"Leodia"
720,"13631;20",17,0.0015175,"Leodia"
721,"13631;20",16.5,0.004105,"Leodia"
722,"13631;20",16,0.010096,"Leodia"
723,"13631;20",15.5,0.022418,"Leodia"
724,"13631;20",15,0.04467,"Leodia"
725,"13631;20",14.5,0.07953,"Leodia"
726,"13631;20",14,0.12604,"Leodia"
727,"13631;20",13.5,0.17733,"Leodia"
728,"13631;20",13,0.22107,"Leodia"
729,"13631;20",12.5,0.24385,"Leodia"
730,"13631;20",12,0.23776,"Leodia"
731,"13631;20",11.5,0.20477,"Leodia"
732,"13631;20",11,0.15568,"Leodia"
733,"13631;20",10.5,0.10442,"Leodia"
734,"13631;20",10,0.06172,"Leodia"
735,"13631;20",9.5,0.03211,"Leodia"
736,"13631;20",9,0.014675,"Leodia"
737,"13631;20",8.5,0.005874,"Leodia"
738,"13631;20",8,0.0020515,"Leodia"
739,"13631;20",7.5,0.0006218,"Leodia"
740,"13631;20",7,0.0001624,"Leodia"
741,"13631;20",6.5,3.633e-05,"Leodia"
742,"13631;20",6,6.828e-06,"Leodia"
743,"13631;20",5.5,9.75e-07,"Leodia"
744,"13631;20",5,2.44e-07,"Leodia"
750,"13631;21",54,1.2133e-05,"Leodia"
751,"13631;21",53.5,0.04397,"Leodia"
752,"13631;21",53,0.17164,"Leodia"
753,"13631;21",52.5,0.03209,"Leodia"
754,"13631;21",52,2.9866e-05,"Leodia"
807,"13631;21",25.5,7e-07,"Leodia"
808,"13631;21",25,2.73e-05,"Leodia"
809,"13631;21",24.5,0.0002387,"Leodia"
810,"13631;21",24,0.000728,"Leodia"
811,"13631;21",23.5,0.0009765,"Leodia"
812,"13631;21",23,0.0006111,"Leodia"
813,"13631;21",22.5,0.0001778,"Leodia"
814,"13631;21",22,2.17e-05,"Leodia"
815,"13631;21",21.5,1.4e-06,"Leodia"
816,"13631;21",21,2.33e-07,"Leodia"
818,"13631;21",20,4.67e-07,"Leodia"
819,"13631;21",19.5,1.4e-06,"Leodia"
820,"13631;21",19,4.667e-06,"Leodia"
821,"13631;21",18.5,1.7033e-05,"Leodia"
822,"13631;21",18,5.833e-05,"Leodia"
823,"13631;21",17.5,0.00018923,"Leodia"
824,"13631;21",17,0.0005761,"Leodia"
825,"13631;21",16.5,0.0016249,"Leodia"
826,"13631;21",16,0.004214,"Leodia"
827,"13631;21",15.5,0.009984,"Leodia"
828,"13631;21",15,0.021483,"Leodia"
829,"13631;21",14.5,0.0418,"Leodia"
830,"13631;21",14,0.07326,"Leodia"
831,"13631;21",13.5,0.11534,"Leodia"
832,"13631;21",13,0.16276,"Leodia"
833,"13631;21",12.5,0.2055,"Leodia"
834,"13631;21",12,0.2318,"Leodia"
835,"13631;21",11.5,0.23333,"Leodia"
836,"13631;21",11,0.20938,"Leodia"
837,"13631;21",10.5,0.16732,"Leodia"
838,"13631;21",10,0.11892,"Leodia"
839,"13631;21",9.5,0.07507,"Leodia"
840,"13631;21",9,0.042,"Leodia"
841,"13631;21",8.5,0.02077,"Leodia"
842,"13631;21",8,0.009048,"Leodia"
843,"13631;21",7.5,0.003456,"Leodia"
844,"13631;21",7,0.0011508,"Leodia"
845,"13631;21",6.5,0.0003316,"Leodia"
846,"13631;21",6,8.19e-05,"Leodia"
847,"13631;21",5.5,1.7266e-05,"Leodia"
848,"13631;21",5,3.0333e-06,"Leodia"
849,"13631;21",4.5,4.67e-07,"Leodia"
856,"13631;23",54,0.0007857,"Leodia"
857,"13631;23",53.5,0.11213,"Leodia"
858,"13631;23",53,0.12455,"Leodia"
859,"13631;23",52.5,0.01228,"Leodia"
860,"13631;23",52,1.3066e-05,"Leodia"
913,"13631;23",25.5,3.96e-07,"Leodia"
914,"13631;23",25,1.0294e-05,"Leodia"
915,"13631;23",24.5,8.889e-05,"Leodia"
916,"13631;23",24,0.00027933,"Leodia"
917,"13631;23",23.5,0.0003759,"Leodia"
918,"13631;23",23,0.00022746,"Leodia"
919,"13631;23",22.5,6.572e-05,"Leodia"
920,"13631;23",22,9.304e-06,"Leodia"
921,"13631;23",21.5,9.9e-07,"Leodia"
922,"13631;23",21,1.98e-07,"Leodia"
923,"13631;23",20.5,1.98e-07,"Leodia"
924,"13631;23",20,5.94e-07,"Leodia"
925,"13631;23",19.5,1.5837e-06,"Leodia"
926,"13631;23",19,4.751e-06,"Leodia"
927,"13631;23",18.5,1.4055e-05,"Leodia"
928,"13631;23",18,3.92e-05,"Leodia"
929,"13631;23",17.5,0.00010611,"Leodia"
930,"13631;23",17,0.00027358,"Leodia"
931,"13631;23",16.5,0.0006709,"Leodia"
932,"13631;23",16,0.0015568,"Leodia"
933,"13631;23",15.5,0.003406,"Leodia"
934,"13631;23",15,0.007006,"Leodia"
935,"13631;23",14.5,0.013505,"Leodia"
936,"13631;23",14,0.024347,"Leodia"
937,"13631;23",13.5,0.04096,"Leodia"
938,"13631;23",13,0.0642,"Leodia"
939,"13631;23",12.5,0.09357,"Leodia"
940,"13631;23",12,0.12662,"Leodia"
941,"13631;23",11.5,0.15884,"Leodia"
942,"13631;23",11,0.18445,"Leodia"
943,"13631;23",10.5,0.19796,"Leodia"
944,"13631;23",10,0.19605,"Leodia"
945,"13631;23",9.5,0.17882,"Leodia"
946,"13631;23",9,0.14993,"Leodia"
947,"13631;23",8.5,0.11528,"Leodia"
948,"13631;23",8,0.08106,"Leodia"
949,"13631;23",7.5,0.05196,"Leodia"
950,"13631;23",7,0.030237,"Leodia"
951,"13631;23",6.5,0.015904,"Leodia"
952,"13631;23",6,0.007519,"Leodia"
953,"13631;23",5.5,0.003174,"Leodia"
954,"13631;23",5,0.0011872,"Leodia"
955,"13631;23",4.5,0.0003898,"Leodia"
956,"13631;23",4,0.00011126,"Leodia"
957,"13631;23",3.5,2.7121e-05,"Leodia"
958,"13631;23",3,5.543e-06,"Leodia"
959,"13631;23",2.5,9.9e-07,"Leodia"
967,"13631;24",53.5,0.0029039,"Leodia"
968,"13631;24",53,0.0847,"Leodia"
969,"13631;24",52.5,0.13398,"Leodia"
970,"13631;24",52,0.002469,"Leodia"
971,"13631;24",51.5,2.17e-07,"Leodia"
1022,"13631;24",26,1.9551e-06,"Leodia"
1023,"13631;24",25.5,8.972e-05,"Leodia"
1024,"13631;24",25,0.0009634,"Leodia"
1025,"13631;24",24.5,0.003753,"Leodia"
1026,"13631;24",24,0.007616,"Leodia"
1027,"13631;24",23.5,0.009642,"Leodia"
1028,"13631;24",23,0.008149,"Leodia"
1029,"13631;24",22.5,0.004684,"Leodia"
1030,"13631;24",22,0.0017598,"Leodia"
1031,"13631;24",21.5,0.0004916,"Leodia"
1032,"13631;24",21,0.00018334,"Leodia"
1033,"13631;24",20.5,0.00021767,"Leodia"
1034,"13631;24",20,0.0005563,"Leodia"
1035,"13631;24",19.5,0.0013727,"Leodia"
1036,"13631;24",19,0.003229,"Leodia"
1037,"13631;24",18.5,0.007162,"Leodia"
1038,"13631;24",18,0.014838,"Leodia"
1039,"13631;24",17.5,0.028485,"Leodia"
1040,"13631;24",17,0.05035,"Leodia"
1041,"13631;24",16.5,0.08151,"Leodia"
1042,"13631;24",16,0.12039,"Leodia"
1043,"13631;24",15.5,0.16167,"Leodia"
1044,"13631;24",15,0.19695,"Leodia"
1045,"13631;24",14.5,0.21723,"Leodia"
1046,"13631;24",14,0.21665,"Leodia"
1047,"13631;24",13.5,0.19518,"Leodia"
1048,"13631;24",13,0.15872,"Leodia"
1049,"13631;24",12.5,0.11644,"Leodia"
1050,"13631;24",12,0.07703,"Leodia"
1051,"13631;24",11.5,0.04592,"Leodia"
1052,"13631;24",11,0.024651,"Leodia"
1053,"13631;24",10.5,0.011904,"Leodia"
1054,"13631;24",10,0.005164,"Leodia"
1055,"13631;24",9.5,0.0020081,"Leodia"
1056,"13631;24",9,0.000698,"Leodia"
1057,"13631;24",8.5,0.00021614,"Leodia"
1058,"13631;24",8,5.93e-05,"Leodia"
1059,"13631;24",7.5,1.4337e-05,"Leodia"
1060,"13631;24",7,3.0412e-06,"Leodia"
1061,"13631;24",6.5,6.52e-07,"Leodia"
1068,"13631;25",54,2.7771e-05,"Leodia"
1069,"13631;25",53.5,0.020131,"Leodia"
1070,"13631;25",53,0.11356,"Leodia"
1071,"13631;25",52.5,0.09262,"Leodia"
1072,"13631;25",52,0.003365,"Leodia"
1073,"13631;25",51.5,3.332e-06,"Leodia"
1074,"13631;25",51,1.59e-07,"Leodia"
1123,"13631;25",26.5,9.52e-07,"Leodia"
1124,"13631;25",26,1.7932e-05,"Leodia"
1125,"13631;25",25.5,0.0002063,"Leodia"
1126,"13631;25",25,0.0011653,"Leodia"
1127,"13631;25",24.5,0.00349,"Leodia"
1128,"13631;25",24,0.006436,"Leodia"
1129,"13631;25",23.5,0.007999,"Leodia"
1130,"13631;25",23,0.007055,"Leodia"
1131,"13631;25",22.5,0.004692,"Leodia"
1132,"13631;25",22,0.0024913,"Leodia"
1133,"13631;25",21.5,0.0012665,"Leodia"
1134,"13631;25",21,0.0008707,"Leodia"
1135,"13631;25",20.5,0.0011269,"Leodia"
1136,"13631;25",20,0.0020931,"Leodia"
1137,"13631;25",19.5,0.003771,"Leodia"
1138,"13631;25",19,0.006562,"Leodia"
1139,"13631;25",18.5,0.010994,"Leodia"
1140,"13631;25",18,0.017686,"Leodia"
1141,"13631;25",17.5,0.027262,"Leodia"
1142,"13631;25",17,0.04019,"Leodia"
1143,"13631;25",16.5,0.05659,"Leodia"
1144,"13631;25",16,0.07602,"Leodia"
1145,"13631;25",15.5,0.09732,"Leodia"
1146,"13631;25",15,0.11863,"Leodia"
1147,"13631;25",14.5,0.13755,"Leodia"
1148,"13631;25",14,0.1516,"Leodia"
1149,"13631;25",13.5,0.15869,"Leodia"
1150,"13631;25",13,0.15762,"Leodia"
1151,"13631;25",12.5,0.14842,"Leodia"
1152,"13631;25",12,0.13236,"Leodia"
1153,"13631;25",11.5,0.11167,"Leodia"
1154,"13631;25",11,0.08902,"Leodia"
1155,"13631;25",10.5,0.06695,"Leodia"
1156,"13631;25",10,0.04744,"Leodia"
1157,"13631;25",9.5,0.031605,"Leodia"
1158,"13631;25",9,0.019757,"Leodia"
1159,"13631;25",8.5,0.01156,"Leodia"
1160,"13631;25",8,0.006313,"Leodia"
1161,"13631;25",7.5,0.003206,"Leodia"
1162,"13631;25",7,0.0015093,"Leodia"
1163,"13631;25",6.5,0.0006554,"Leodia"
1164,"13631;25",6,0.0002612,"Leodia"
1165,"13631;25",5.5,9.49e-05,"Leodia"
1166,"13631;25",5,3.1262e-05,"Leodia"
1167,"13631;25",4.5,9.204e-06,"Leodia"
1168,"13631;25",4,2.3804e-06,"Leodia"
1169,"13631;25",3.5,6.35e-07,"Leodia"
1170,"13631;25",3,1.59e-07,"Leodia"
1176,"13631;26",53.5,0.0005998,"Leodia"
1177,"13631;26",53,0.04599,"Leodia"
1178,"13631;26",52.5,0.15857,"Leodia"
1179,"13631;26",52,0.006031,"Leodia"
1180,"13631;26",51.5,6.85e-07,"Leodia"
1231,"13631;26",26,6.619e-06,"Leodia"
1232,"13631;26",25.5,0.00024512,"Leodia"
1233,"13631;26",25,0.002126,"Leodia"
1234,"13631;26",24.5,0.007093,"Leodia"
1235,"13631;26",24,0.013186,"Leodia"
1236,"13631;26",23.5,0.016418,"Leodia"
1237,"13631;26",23,0.014699,"Leodia"
1238,"13631;26",22.5,0.009581,"Leodia"
1239,"13631;26",22,0.00432,"Leodia"
1240,"13631;26",21.5,0.0014639,"Leodia"
1241,"13631;26",21,0.0006208,"Leodia"
1242,"13631;26",20.5,0.0007568,"Leodia"
1243,"13631;26",20,0.0018694,"Leodia"
1244,"13631;26",19.5,0.004413,"Leodia"
1245,"13631;26",19,0.009814,"Leodia"
1246,"13631;26",18.5,0.020313,"Leodia"
1247,"13631;26",18,0.03873,"Leodia"
1248,"13631;26",17.5,0.06743,"Leodia"
1249,"13631;26",17,0.10648,"Leodia"
1250,"13631;26",16.5,0.15171,"Leodia"
1251,"13631;26",16,0.19419,"Leodia"
1252,"13631;26",15.5,0.22267,"Leodia"
1253,"13631;26",15,0.22823,"Leodia"
1254,"13631;26",14.5,0.20883,"Leodia"
1255,"13631;26",14,0.17044,"Leodia"
1256,"13631;26",13.5,0.12404,"Leodia"
1257,"13631;26",13,0.08049,"Leodia"
1258,"13631;26",12.5,0.04658,"Leodia"
1259,"13631;26",12,0.024043,"Leodia"
1260,"13631;26",11.5,0.011068,"Leodia"
1261,"13631;26",11,0.004543,"Leodia"
1262,"13631;26",10.5,0.0016617,"Leodia"
1263,"13631;26",10,0.0005409,"Leodia"
1264,"13631;26",9.5,0.00015634,"Leodia"
1265,"13631;26",9,3.994e-05,"Leodia"
1266,"13631;26",8.5,8.901e-06,"Leodia"
1267,"13631;26",8,1.8258e-06,"Leodia"
1268,"13631;26",7.5,2.28e-07,"Leodia"
1275,"13631;28",54,1.1748e-06,"Leodia"
1276,"13631;28",53.5,0.017428,"Leodia"
1277,"13631;28",53,0.15764,"Leodia"
1278,"13631;28",52.5,0.06565,"Leodia"
1279,"13631;28",52,0.00016307,"Leodia"
1332,"13631;28",25.5,3.994e-06,"Leodia"
1333,"13631;28",25,0.00010644,"Leodia"
1334,"13631;28",24.5,0.0007021,"Leodia"
1335,"13631;28",24,0.0018527,"Leodia"
1336,"13631;28",23.5,0.0024422,"Leodia"
1337,"13631;28",23,0.0017152,"Leodia"
1338,"13631;28",22.5,0.0006422,"Leodia"
1339,"13631;28",22,0.00011631,"Leodia"
1340,"13631;28",21.5,1.1983e-05,"Leodia"
1341,"13631;28",21,1.6447e-06,"Leodia"
1342,"13631;28",20.5,1.6447e-06,"Leodia"
1343,"13631;28",20,5.169e-06,"Leodia"
1344,"13631;28",19.5,1.7387e-05,"Leodia"
1345,"13631;28",19,5.663e-05,"Leodia"
1346,"13631;28",18.5,0.00017834,"Leodia"
1347,"13631;28",18,0.000532,"Leodia"
1348,"13631;28",17.5,0.0014861,"Leodia"
1349,"13631;28",17,0.003848,"Leodia"
1350,"13631;28",16.5,0.009153,"Leodia"
1351,"13631;28",16,0.019855,"Leodia"
1352,"13631;28",15.5,0.03905,"Leodia"
1353,"13631;28",15,0.06928,"Leodia"
1354,"13631;28",14.5,0.11051,"Leodia"
1355,"13631;28",14,0.15801,"Leodia"
1356,"13631;28",13.5,0.20206,"Leodia"
1357,"13631;28",13,0.23073,"Leodia"
1358,"13631;28",12.5,0.23496,"Leodia"
1359,"13631;28",12,0.21321,"Leodia"
1360,"13631;28",11.5,0.17226,"Leodia"
1361,"13631;28",11,0.12382,"Leodia"
1362,"13631;28",10.5,0.07912,"Leodia"
1363,"13631;28",10,0.0449,"Leodia"
1364,"13631;28",9.5,0.022586,"Leodia"
1365,"13631;28",9,0.010051,"Leodia"
1366,"13631;28",8.5,0.003945,"Leodia"
1367,"13631;28",8,0.0013597,"Leodia"
1368,"13631;28",7.5,0.0004095,"Leodia"
1369,"13631;28",7,0.00010714,"Leodia"
1370,"13631;28",6.5,2.3966e-05,"Leodia"
1371,"13631;28",6,4.699e-06,"Leodia"
1372,"13631;28",5.5,7.05e-07,"Leodia"
1379,"13631;3",53.5,0.0006063,"Leodia"
1380,"13631;3",53,0.03297,"Leodia"
1381,"13631;3",52.5,0.14151,"Leodia"
1382,"13631;3",52,0.017398,"Leodia"
1383,"13631;3",51.5,1.8396e-05,"Leodia"
1384,"13631;3",51,7.36e-07,"Leodia"
1432,"13631;3",27,1.84e-07,"Leodia"
1433,"13631;3",26.5,4.047e-06,"Leodia"
1434,"13631;3",26,0.00010853,"Leodia"
1435,"13631;3",25.5,0.0012125,"Leodia"
1436,"13631;3",25,0.005584,"Leodia"
1437,"13631;3",24.5,0.013514,"Leodia"
1438,"13631;3",24,0.02162,"Leodia"
1439,"13631;3",23.5,0.026033,"Leodia"
1440,"13631;3",23,0.0251,"Leodia"
1441,"13631;3",22.5,0.019933,"Leodia"
1442,"13631;3",22,0.013054,"Leodia"
1443,"13631;3",21.5,0.007778,"Leodia"
1444,"13631;3",21,0.005714,"Leodia"
1445,"13631;3",20.5,0.007492,"Leodia"
1446,"13631;3",20,0.013708,"Leodia"
1447,"13631;3",19.5,0.023844,"Leodia"
1448,"13631;3",19,0.03917,"Leodia"
1449,"13631;3",18.5,0.06047,"Leodia"
1450,"13631;3",18,0.08732,"Leodia"
1451,"13631;3",17.5,0.11755,"Leodia"
1452,"13631;3",17,0.14714,"Leodia"
1453,"13631;3",16.5,0.17092,"Leodia"
1454,"13631;3",16,0.18396,"Leodia"
1455,"13631;3",15.5,0.18323,"Leodia"
1456,"13631;3",15,0.16874,"Leodia"
1457,"13631;3",14.5,0.14359,"Leodia"
1458,"13631;3",14,0.11283,"Leodia"
1459,"13631;3",13.5,0.08183,"Leodia"
1460,"13631;3",13,0.05475,"Leodia"
1461,"13631;3",12.5,0.03377,"Leodia"
1462,"13631;3",12,0.019194,"Leodia"
1463,"13631;3",11.5,0.010042,"Leodia"
1464,"13631;3",11,0.004831,"Leodia"
1465,"13631;3",10.5,0.0021337,"Leodia"
1466,"13631;3",10,0.0008635,"Leodia"
1467,"13631;3",9.5,0.0003195,"Leodia"
1468,"13631;3",9,0.0001078,"Leodia"
1469,"13631;3",8.5,3.293e-05,"Leodia"
1470,"13631;3",8,9.198e-06,"Leodia"
1471,"13631;3",7.5,2.2075e-06,"Leodia"
1472,"13631;3",7,5.52e-07,"Leodia"
1473,"13631;3",6.5,1.84e-07,"Leodia"
1479,"13631;31",54,1.4342e-05,"Leodia"
1480,"13631;31",53.5,0.04119,"Leodia"
1481,"13631;31",53,0.1675,"Leodia"
1482,"13631;31",52.5,0.03781,"Leodia"
1483,"13631;31",52,5.647e-05,"Leodia"
1536,"13631;31",25.5,1.3445e-06,"Leodia"
1537,"13631;31",25,4.258e-05,"Leodia"
1538,"13631;31",24.5,0.0003247,"Leodia"
1539,"13631;31",24,0.000932,"Leodia"
1540,"13631;31",23.5,0.0012415,"Leodia"
1541,"13631;31",23,0.0008143,"Leodia"
1542,"13631;31",22.5,0.00026644,"Leodia"
1543,"13631;31",22,4.056e-05,"Leodia"
1544,"13631;31",21.5,3.585e-06,"Leodia"
1545,"13631;31",21,4.48e-07,"Leodia"
1546,"13631;31",20.5,4.48e-07,"Leodia"
1547,"13631;31",20,1.5686e-06,"Leodia"
1548,"13631;31",19.5,4.93e-06,"Leodia"
1549,"13631;31",19,1.6359e-05,"Leodia"
1550,"13631;31",18.5,5.221e-05,"Leodia"
1551,"13631;31",18,0.0001591,"Leodia"
1552,"13631;31",17.5,0.0004583,"Leodia"
1553,"13631;31",17,0.0012388,"Leodia"
1554,"13631;31",16.5,0.0031153,"Leodia"
1555,"13631;31",16,0.007242,"Leodia"
1556,"13631;31",15.5,0.015477,"Leodia"
1557,"13631;31",15,0.030272,"Leodia"
1558,"13631;31",14.5,0.054,"Leodia"
1559,"13631;31",14,0.08756,"Leodia"
1560,"13631;31",13.5,0.12879,"Leodia"
1561,"13631;31",13,0.17148,"Leodia"
1562,"13631;31",12.5,0.20635,"Leodia"
1563,"13631;31",12,0.22409,"Leodia"
1564,"13631;31",11.5,0.21937,"Leodia"
1565,"13631;31",11,0.19336,"Leodia"
1566,"13631;31",10.5,0.15328,"Leodia"
1567,"13631;31",10,0.10911,"Leodia"
1568,"13631;31",9.5,0.06964,"Leodia"
1569,"13631;31",9,0.03976,"Leodia"
1570,"13631;31",8.5,0.020252,"Leodia"
1571,"13631;31",8,0.00917,"Leodia"
1572,"13631;31",7.5,0.003675,"Leodia"
1573,"13631;31",7,0.0012964,"Leodia"
1574,"13631;31",6.5,0.0003996,"Leodia"
1575,"13631;31",6,0.00010667,"Leodia"
1576,"13631;31",5.5,2.4426e-05,"Leodia"
1577,"13631;31",5,4.706e-06,"Leodia"
1578,"13631;31",4.5,6.72e-07,"Leodia"
1585,"13631;32",54,7.076e-05,"Leodia"
1586,"13631;32",53.5,0.06192,"Leodia"
1587,"13631;32",53,0.15831,"Leodia"
1588,"13631;32",52.5,0.028147,"Leodia"
1589,"13631;32",52,4.401e-05,"Leodia"
1642,"13631;32",25.5,1.0529e-06,"Leodia"
1643,"13631;32",25,3.1588e-05,"Leodia"
1644,"13631;32",24.5,0.0002386,"Leodia"
1645,"13631;32",24,0.0006909,"Leodia"
1646,"13631;32",23.5,0.0009213,"Leodia"
1647,"13631;32",23,0.0005981,"Leodia"
1648,"13631;32",22.5,0.00019542,"Leodia"
1649,"13631;32",22,3.1588e-05,"Leodia"
1650,"13631;32",21.5,3.369e-06,"Leodia"
1651,"13631;32",21,6.32e-07,"Leodia"
1652,"13631;32",20.5,6.32e-07,"Leodia"
1653,"13631;32",20,1.6847e-06,"Leodia"
1654,"13631;32",19.5,5.475e-06,"Leodia"
1655,"13631;32",19,1.6847e-05,"Leodia"
1656,"13631;32",18.5,4.949e-05,"Leodia"
1657,"13631;32",18,0.00014067,"Leodia"
1658,"13631;32",17.5,0.0003801,"Leodia"
1659,"13631;32",17,0.000971,"Leodia"
1660,"13631;32",16.5,0.0023308,"Leodia"
1661,"13631;32",16,0.005229,"Leodia"
1662,"13631;32",15.5,0.010915,"Leodia"
1663,"13631;32",15,0.021127,"Leodia"
1664,"13631;32",14.5,0.0378,"Leodia"
1665,"13631;32",14,0.06235,"Leodia"
1666,"13631;32",13.5,0.09462,"Leodia"
1667,"13631;32",13,0.13186,"Leodia"
1668,"13631;32",12.5,0.16845,"Leodia"
1669,"13631;32",12,0.19699,"Leodia"
1670,"13631;32",11.5,0.21059,"Leodia"
1671,"13631;32",11,0.20551,"Leodia"
1672,"13631;32",10.5,0.18281,"Leodia"
1673,"13631;32",10,0.14802,"Leodia"
1674,"13631;32",9.5,0.10888,"Leodia"
1675,"13631;32",9,0.07261,"Leodia"
1676,"13631;32",8.5,0.04378,"Leodia"
1677,"13631;32",8,0.023791,"Leodia"
1678,"13631;32",7.5,0.011607,"Leodia"
1679,"13631;32",7,0.00506,"Leodia"
1680,"13631;32",6.5,0.0019589,"Leodia"
1681,"13631;32",6,0.0006688,"Leodia"
1682,"13631;32",5.5,0.00019964,"Leodia"
1683,"13631;32",5,5.159e-05,"Leodia"
1684,"13631;32",4.5,1.1372e-05,"Leodia"
1685,"13631;32",4,2.1059e-06,"Leodia"
1686,"13631;32",3.5,4.21e-07,"Leodia"
1693,"13631;33",54,2.4611e-05,"Leodia"
1694,"13631;33",53.5,0.04482,"Leodia"
1695,"13631;33",53,0.16353,"Leodia"
1696,"13631;33",52.5,0.03808,"Leodia"
1697,"13631;33",52,7.383e-05,"Leodia"
1750,"13631;33",25.5,1.9261e-06,"Leodia"
1751,"13631;33",25,4.986e-05,"Leodia"
1752,"13631;33",24.5,0.0003535,"Leodia"
1753,"13631;33",24,0.0009844,"Leodia"
1754,"13631;33",23.5,0.0013067,"Leodia"
1755,"13631;33",23,0.0008762,"Leodia"
1756,"13631;33",22.5,0.00030432,"Leodia"
1757,"13631;33",22,5.286e-05,"Leodia"
1758,"13631;33",21.5,5.992e-06,"Leodia"
1759,"13631;33",21,1.0701e-06,"Leodia"
1760,"13631;33",20.5,1.0701e-06,"Leodia"
1761,"13631;33",20,3.21e-06,"Leodia"
1762,"13631;33",19.5,1.0058e-05,"Leodia"
1763,"13631;33",19,3.0175e-05,"Leodia"
1764,"13631;33",18.5,8.881e-05,"Leodia"
1765,"13631;33",18,0.00025018,"Leodia"
1766,"13631;33",17.5,0.0006677,"Leodia"
1767,"13631;33",17,0.0016772,"Leodia"
1768,"13631;33",16.5,0.003939,"Leodia"
1769,"13631;33",16,0.0086,"Leodia"
1770,"13631;33",15.5,0.017381,"Leodia"
1771,"13631;33",15,0.03239,"Leodia"
1772,"13631;33",14.5,0.05548,"Leodia"
1773,"13631;33",14,0.08713,"Leodia"
1774,"13631;33",13.5,0.12518,"Leodia"
1775,"13631;33",13,0.16424,"Leodia"
1776,"13631;33",12.5,0.19647,"Leodia"
1777,"13631;33",12,0.21401,"Leodia"
1778,"13631;33",11.5,0.21199,"Leodia"
1779,"13631;33",11,0.19071,"Leodia"
1780,"13631;33",10.5,0.15561,"Leodia"
1781,"13631;33",10,0.115,"Leodia"
1782,"13631;33",9.5,0.07682,"Leodia"
1783,"13631;33",9,0.04629,"Leodia"
1784,"13631;33",8.5,0.025095,"Leodia"
1785,"13631;33",8,0.012196,"Leodia"
1786,"13631;33",7.5,0.005291,"Leodia"
1787,"13631;33",7,0.0020384,"Leodia"
1788,"13631;33",6.5,0.000693,"Leodia"
1789,"13631;33",6,0.00020631,"Leodia"
1790,"13631;33",5.5,5.329e-05,"Leodia"
1791,"13631;33",5,1.1771e-05,"Leodia"
1792,"13631;33",4.5,2.1401e-06,"Leodia"
1793,"13631;33",4,4.28e-07,"Leodia"
1800,"13631;34",54,1.2234e-06,"Leodia"
1801,"13631;34",53.5,0.019524,"Leodia"
1802,"13631;34",53,0.16493,"Leodia"
1803,"13631;34",52.5,0.05786,"Leodia"
1804,"13631;34",52,9.762e-05,"Leodia"
1857,"13631;34",25.5,2.2021e-06,"Leodia"
1858,"13631;34",25,7.34e-05,"Leodia"
1859,"13631;34",24.5,0.0005397,"Leodia"
1860,"13631;34",24,0.0014954,"Leodia"
1861,"13631;34",23.5,0.0019836,"Leodia"
1862,"13631;34",23,0.0013433,"Leodia"
1863,"13631;34",22.5,0.0004595,"Leodia"
1864,"13631;34",22,7.022e-05,"Leodia"
1865,"13631;34",21.5,5.383e-06,"Leodia"
1866,"13631;34",21,4.89e-07,"Leodia"
1867,"13631;34",20.5,4.89e-07,"Leodia"
1868,"13631;34",20,1.7127e-06,"Leodia"
1869,"13631;34",19.5,6.117e-06,"Leodia"
1870,"13631;34",19,2.1776e-05,"Leodia"
1871,"13631;34",18.5,7.487e-05,"Leodia"
1872,"13631;34",18,0.0002459,"Leodia"
1873,"13631;34",17.5,0.0007565,"Leodia"
1874,"13631;34",17,0.0021546,"Leodia"
1875,"13631;34",16.5,0.005622,"Leodia"
1876,"13631;34",16,0.013322,"Leodia"
1877,"13631;34",15.5,0.028475,"Leodia"
1878,"13631;34",15,0.05459,"Leodia"
1879,"13631;34",14.5,0.09345,"Leodia"
1880,"13631;34",14,0.14237,"Leodia"
1881,"13631;34",13.5,0.19254,"Leodia"
1882,"13631;34",13,0.23072,"Leodia"
1883,"13631;34",12.5,0.24467,"Leodia"
1884,"13631;34",12,0.2294,"Leodia"
1885,"13631;34",11.5,0.19005,"Leodia"
1886,"13631;34",11,0.13903,"Leodia"
1887,"13631;34",10.5,0.08976,"Leodia"
1888,"13631;34",10,0.05109,"Leodia"
1889,"13631;34",9.5,0.025604,"Leodia"
1890,"13631;34",9,0.011274,"Leodia"
1891,"13631;34",8.5,0.004349,"Leodia"
1892,"13631;34",8,0.0014639,"Leodia"
1893,"13631;34",7.5,0.0004277,"Leodia"
1894,"13631;34",7,0.00010766,"Leodia"
1895,"13631;34",6.5,2.3244e-05,"Leodia"
1896,"13631;34",6,4.159e-06,"Leodia"
1897,"13631;34",5.5,7.34e-07,"Leodia"
1904,"13631;37",54,1.3856e-06,"Leodia"
1905,"13631;37",53.5,0.010392,"Leodia"
1906,"13631;37",53,0.11727,"Leodia"
1907,"13631;37",52.5,0.1024,"Leodia"
1908,"13631;37",52,0.0015184,"Leodia"
1909,"13631;37",51.5,1.98e-07,"Leodia"
1960,"13631;37",26,1.5835e-06,"Leodia"
1961,"13631;37",25.5,5.839e-05,"Leodia"
1962,"13631;37",25,0.0006012,"Leodia"
1963,"13631;37",24.5,0.0024094,"Leodia"
1964,"13631;37",24,0.005043,"Leodia"
1965,"13631;37",23.5,0.006418,"Leodia"
1966,"13631;37",23,0.005286,"Leodia"
1967,"13631;37",22.5,0.0029226,"Leodia"
1968,"13631;37",22,0.0010873,"Leodia"
1969,"13631;37",21.5,0.0003278,"Leodia"
1970,"13631;37",21,0.00014054,"Leodia"
1971,"13631;37",20.5,0.00017241,"Leodia"
1972,"13631;37",20,0.0004095,"Leodia"
1973,"13631;37",19.5,0.0009436,"Leodia"
1974,"13631;37",19,0.0020889,"Leodia"
1975,"13631;37",18.5,0.004407,"Leodia"
1976,"13631;37",18,0.008804,"Leodia"
1977,"13631;37",17.5,0.016558,"Leodia"
1978,"13631;37",17,0.029186,"Leodia"
1979,"13631;37",16.5,0.04804,"Leodia"
1980,"13631;37",16,0.07361,"Leodia"
1981,"13631;37",15.5,0.10475,"Leodia"
1982,"13631;37",15,0.13817,"Leodia"
1983,"13631;37",14.5,0.16863,"Leodia"
1984,"13631;37",14,0.19017,"Leodia"
1985,"13631;37",13.5,0.19794,"Leodia"
1986,"13631;37",13,0.18996,"Leodia"
1987,"13631;37",12.5,0.1679,"Leodia"
1988,"13631;37",12,0.13655,"Leodia"
1989,"13631;37",11.5,0.10208,"Leodia"
1990,"13631;37",11,0.07006,"Leodia"
1991,"13631;37",10.5,0.04409,"Leodia"
1992,"13631;37",10,0.025393,"Leodia"
1993,"13631;37",9.5,0.013359,"Leodia"
1994,"13631;37",9,0.006403,"Leodia"
1995,"13631;37",8.5,0.0027876,"Leodia"
1996,"13631;37",8,0.001098,"Leodia"
1997,"13631;37",7.5,0.0003896,"Leodia"
1998,"13631;37",7,0.00012371,"Leodia"
1999,"13631;37",6.5,3.504e-05,"Leodia"
2000,"13631;37",6,8.709e-06,"Leodia"
2001,"13631;37",5.5,1.9794e-06,"Leodia"
2002,"13631;37",5,3.96e-07,"Leodia"
2009,"13631;38",53.5,7.474e-05,"Leodia"
2010,"13631;38",53,0.012862,"Leodia"
2011,"13631;38",52.5,0.12884,"Leodia"
2012,"13631;38",52,0.029716,"Leodia"
2013,"13631;38",51.5,3.333e-05,"Leodia"
2014,"13631;38",51,9.86e-07,"Leodia"
2049,"13631;38",33.5,1.97e-07,"Leodia"
2050,"13631;38",33,1.97e-07,"Leodia"
2062,"13631;38",27,1.97e-07,"Leodia"
2063,"13631;38",26.5,6.311e-06,"Leodia"
2064,"13631;38",26,0.00020352,"Leodia"
2065,"13631;38",25.5,0.0022242,"Leodia"
2066,"13631;38",25,0.009317,"Leodia"
2067,"13631;38",24.5,0.020589,"Leodia"
2068,"13631;38",24,0.031065,"Leodia"
2069,"13631;38",23.5,0.03686,"Leodia"
2070,"13631;38",23,0.0367,"Leodia"
2071,"13631;38",22.5,0.031287,"Leodia"
2072,"13631;38",22,0.022491,"Leodia"
2073,"13631;38",21.5,0.014533,"Leodia"
2074,"13631;38",21,0.011105,"Leodia"
2075,"13631;38",20.5,0.014677,"Leodia"
2076,"13631;38",20,0.026543,"Leodia"
2077,"13631;38",19.5,0.04506,"Leodia"
2078,"13631;38",19,0.0712,"Leodia"
2079,"13631;38",18.5,0.10401,"Leodia"
2080,"13631;38",18,0.13972,"Leodia"
2081,"13631;38",17.5,0.17185,"Leodia"
2082,"13631;38",17,0.19291,"Leodia"
2083,"13631;38",16.5,0.19721,"Leodia"
2084,"13631;38",16,0.18331,"Leodia"
2085,"13631;38",15.5,0.15476,"Leodia"
2086,"13631;38",15,0.11861,"Leodia"
2087,"13631;38",14.5,0.0825,"Leodia"
2088,"13631;38",14,0.05208,"Leodia"
2089,"13631;38",13.5,0.029837,"Leodia"
2090,"13631;38",13,0.015518,"Leodia"
2091,"13631;38",12.5,0.007326,"Leodia"
2092,"13631;38",12,0.0031394,"Leodia"
2093,"13631;38",11.5,0.0012206,"Leodia"
2094,"13631;38",11,0.0004303,"Leodia"
2095,"13631;38",10.5,0.00013726,"Leodia"
2096,"13631;38",10,3.964e-05,"Leodia"
2097,"13631;38",9.5,1.0255e-05,"Leodia"
2098,"13631;38",9,2.3666e-06,"Leodia"
2099,"13631;38",8.5,5.92e-07,"Leodia"
2106,"13631;39",54,2.4869e-05,"Leodia"
2107,"13631;39",53.5,0.04159,"Leodia"
2108,"13631;39",53,0.16044,"Leodia"
2109,"13631;39",52.5,0.04327,"Leodia"
2110,"13631;39",52,0.00011766,"Leodia"
2163,"13631;39",25.5,3.1348e-06,"Leodia"
2164,"13631;39",25,7.064e-05,"Leodia"
2165,"13631;39",24.5,0.0004529,"Leodia"
2166,"13631;39",24,0.0012052,"Leodia"
2167,"13631;39",23.5,0.0015906,"Leodia"
2168,"13631;39",23,0.0011032,"Leodia"
2169,"13631;39",22.5,0.0004159,"Leodia"
2170,"13631;39",22,8.38e-05,"Leodia"
2171,"13631;39",21.5,1.1703e-05,"Leodia"
2172,"13631;39",21,2.5078e-06,"Leodia"
2173,"13631;39",20.5,2.7168e-06,"Leodia"
2174,"13631;39",20,7.941e-06,"Leodia"
2175,"13631;39",19.5,2.2988e-05,"Leodia"
2176,"13631;39",19,6.52e-05,"Leodia"
2177,"13631;39",18.5,0.00017847,"Leodia"
2178,"13631;39",18,0.0004671,"Leodia"
2179,"13631;39",17.5,0.0011597,"Leodia"
2180,"13631;39",17,0.0027131,"Leodia"
2181,"13631;39",16.5,0.005946,"Leodia"
2182,"13631;39",16,0.012154,"Leodia"
2183,"13631;39",15.5,0.023074,"Leodia"
2184,"13631;39",15,0.04055,"Leodia"
2185,"13631;39",14.5,0.06581,"Leodia"
2186,"13631;39",14,0.09839,"Leodia"
2187,"13631;39",13.5,0.13525,"Leodia"
2188,"13631;39",13,0.17066,"Leodia"
2189,"13631;39",12.5,0.19739,"Leodia"
2190,"13631;39",12,0.20899,"Leodia"
2191,"13631;39",11.5,0.20229,"Leodia"
2192,"13631;39",11,0.17879,"Leodia"
2193,"13631;39",10.5,0.14409,"Leodia"
2194,"13631;39",10,0.10571,"Leodia"
2195,"13631;39",9.5,0.07048,"Leodia"
2196,"13631;39",9,0.0426,"Leodia"
2197,"13631;39",8.5,0.023285,"Leodia"
2198,"13631;39",8,0.011468,"Leodia"
2199,"13631;39",7.5,0.005069,"Leodia"
2200,"13631;39",7,0.002,"Leodia"
2201,"13631;39",6.5,0.0007003,"Leodia"
2202,"13631;39",6,0.00021588,"Leodia"
2203,"13631;39",5.5,5.81e-05,"Leodia"
2204,"13631;39",5,1.3584e-05,"Leodia"
2205,"13631;39",4.5,2.7168e-06,"Leodia"
2206,"13631;39",4,4.18e-07,"Leodia"
2213,"13631;4",54,1.1231e-06,"Leodia"
2214,"13631;4",53.5,0.027457,"Leodia"
2215,"13631;4",53,0.18595,"Leodia"
2216,"13631;4",52.5,0.03401,"Leodia"
2217,"13631;4",52,1.2354e-05,"Leodia"
2270,"13631;4",25.5,2.81e-07,"Leodia"
2271,"13631;4",25,1.8532e-05,"Leodia"
2272,"13631;4",24.5,0.00020609,"Leodia"
2273,"13631;4",24,0.0006862,"Leodia"
2274,"13631;4",23.5,0.0009291,"Leodia"
2275,"13631;4",23,0.0005439,"Leodia"
2276,"13631;4",22.5,0.00012888,"Leodia"
2277,"13631;4",22,9.266e-06,"Leodia"
2278,"13631;4",21.5,2.81e-07,"Leodia"
2283,"13631;4",19,2.81e-07,"Leodia"
2284,"13631;4",18.5,1.1231e-06,"Leodia"
2285,"13631;4",18,5.896e-06,"Leodia"
2286,"13631;4",17.5,2.7797e-05,"Leodia"
2287,"13631;4",17,0.00012326,"Leodia"
2288,"13631;4",16.5,0.0004984,"Leodia"
2289,"13631;4",16,0.0017973,"Leodia"
2290,"13631;4",15.5,0.005712,"Leodia"
2291,"13631;4",15,0.015819,"Leodia"
2292,"13631;4",14.5,0.03785,"Leodia"
2293,"13631;4",14,0.07775,"Leodia"
2294,"13631;4",13.5,0.13647,"Leodia"
2295,"13631;4",13,0.2041,"Leodia"
2296,"13631;4",12.5,0.25965,"Leodia"
2297,"13631;4",12,0.28078,"Leodia"
2298,"13631;4",11.5,0.25813,"Leodia"
2299,"13631;4",11,0.20184,"Leodia"
2300,"13631;4",10.5,0.13432,"Leodia"
2301,"13631;4",10,0.07611,"Leodia"
2302,"13631;4",9.5,0.03672,"Leodia"
2303,"13631;4",9,0.015069,"Leodia"
2304,"13631;4",8.5,0.00525,"Leodia"
2305,"13631;4",8,0.0015465,"Leodia"
2306,"13631;4",7.5,0.0003833,"Leodia"
2307,"13631;4",7,7.918e-05,"Leodia"
2308,"13631;4",6.5,1.3478e-05,"Leodia"
2309,"13631;4",6,1.9655e-06,"Leodia"
2310,"13631;4",5.5,2.81e-07,"Leodia"
2316,"13631;40",54,8.772e-06,"Leodia"
2317,"13631;40",53.5,0.04051,"Leodia"
2318,"13631;40",53,0.17311,"Leodia"
2319,"13631;40",52.5,0.03374,"Leodia"
2320,"13631;40",52,3.0584e-05,"Leodia"
2373,"13631;40",25.5,7.11e-07,"Leodia"
2374,"13631;40",25,2.845e-05,"Leodia"
2375,"13631;40",24.5,0.0002506,"Leodia"
2376,"13631;40",24,0.0007639,"Leodia"
2377,"13631;40",23.5,0.0010247,"Leodia"
2378,"13631;40",23,0.0006418,"Leodia"
2379,"13631;40",22.5,0.00018635,"Leodia"
2380,"13631;40",22,2.2286e-05,"Leodia"
2381,"13631;40",21.5,1.1854e-06,"Leodia"
2384,"13631;40",20,2.37e-07,"Leodia"
2385,"13631;40",19.5,1.1854e-06,"Leodia"
2386,"13631;40",19,4.505e-06,"Leodia"
2387,"13631;40",18.5,1.6122e-05,"Leodia"
2388,"13631;40",18,5.666e-05,"Leodia"
2389,"13631;40",17.5,0.00018801,"Leodia"
2390,"13631;40",17,0.0005825,"Leodia"
2391,"13631;40",16.5,0.0016691,"Leodia"
2392,"13631;40",16,0.004386,"Leodia"
2393,"13631;40",15.5,0.010495,"Leodia"
2394,"13631;40",15,0.022737,"Leodia"
2395,"13631;40",14.5,0.04438,"Leodia"
2396,"13631;40",14,0.07777,"Leodia"
2397,"13631;40",13.5,0.12198,"Leodia"
2398,"13631;40",13,0.17085,"Leodia"
2399,"13631;40",12.5,0.21331,"Leodia"
2400,"13631;40",12,0.23708,"Leodia"
2401,"13631;40",11.5,0.23433,"Leodia"
2402,"13631;40",11,0.20576,"Leodia"
2403,"13631;40",10.5,0.16036,"Leodia"
2404,"13631;40",10,0.1108,"Leodia"
2405,"13631;40",9.5,0.06777,"Leodia"
2406,"13631;40",9,0.03662,"Leodia"
2407,"13631;40",8.5,0.01744,"Leodia"
2408,"13631;40",8,0.007292,"Leodia"
2409,"13631;40",7.5,0.0026643,"Leodia"
2410,"13631;40",7,0.0008457,"Leodia"
2411,"13631;40",6.5,0.00023139,"Leodia"
2412,"13631;40",6,5.406e-05,"Leodia"
2413,"13631;40",5.5,1.0669e-05,"Leodia"
2414,"13631;40",5,1.6596e-06,"Leodia"
2415,"13631;40",4.5,2.37e-07,"Leodia"
2421,"13631;41",54,1.4823e-05,"Leodia"
2422,"13631;41",53.5,0.04004,"Leodia"
2423,"13631;41",53,0.16595,"Leodia"
2424,"13631;41",52.5,0.04004,"Leodia"
2425,"13631;41",52,7.057e-05,"Leodia"
2478,"13631;41",25.5,1.7699e-06,"Leodia"
2479,"13631;41",25,4.978e-05,"Leodia"
2480,"13631;41",24.5,0.0003628,"Leodia"
2481,"13631;41",24,0.0010192,"Leodia"
2482,"13631;41",23.5,0.0013542,"Leodia"
2483,"13631;41",23,0.0009029,"Leodia"
2484,"13631;41",22.5,0.00030729,"Leodia"
2485,"13631;41",22,5.044e-05,"Leodia"
2486,"13631;41",21.5,5.088e-06,"Leodia"
2487,"13631;41",21,8.85e-07,"Leodia"
2488,"13631;41",20.5,6.64e-07,"Leodia"
2489,"13631;41",20,2.4336e-06,"Leodia"
2490,"13631;41",19.5,7.743e-06,"Leodia"
2491,"13631;41",19,2.4557e-05,"Leodia"
2492,"13631;41",18.5,7.5e-05,"Leodia"
2493,"13631;41",18,0.00021946,"Leodia"
2494,"13631;41",17.5,0.0006086,"Leodia"
2495,"13631;41",17,0.001584,"Leodia"
2496,"13631;41",16.5,0.003841,"Leodia"
2497,"13631;41",16,0.008621,"Leodia"
2498,"13631;41",15.5,0.017828,"Leodia"
2499,"13631;41",15,0.03382,"Leodia"
2500,"13631;41",14.5,0.05866,"Leodia"
2501,"13631;41",14,0.09277,"Leodia"
2502,"13631;41",13.5,0.13346,"Leodia"
2503,"13631;41",13,0.17431,"Leodia"
2504,"13631;41",12.5,0.20639,"Leodia"
2505,"13631;41",12,0.22123,"Leodia"
2506,"13631;41",11.5,0.21443,"Leodia"
2507,"13631;41",11,0.18771,"Leodia"
2508,"13631;41",10.5,0.14821,"Leodia"
2509,"13631;41",10,0.10541,"Leodia"
2510,"13631;41",9.5,0.06741,"Leodia"
2511,"13631;41",9,0.03868,"Leodia"
2512,"13631;41",8.5,0.019854,"Leodia"
2513,"13631;41",8,0.009086,"Leodia"
2514,"13631;41",7.5,0.003691,"Leodia"
2515,"13631;41",7,0.0013236,"Leodia"
2516,"13631;41",6.5,0.0004161,"Leodia"
2517,"13631;41",6,0.00011371,"Leodia"
2518,"13631;41",5.5,2.6769e-05,"Leodia"
2519,"13631;41",5,5.31e-06,"Leodia"
2520,"13631;41",4.5,8.85e-07,"Leodia"
2521,"13631;41",4,2.21e-07,"Leodia"
2527,"13631;5",54,0.0009426,"Leodia"
2528,"13631;5",53.5,0.18428,"Leodia"
2529,"13631;5",53,0.0666,"Leodia"
2530,"13631;5",52.5,0.0007369,"Leodia"
2586,"13631;5",24.5,3.0415e-06,"Leodia"
2587,"13631;5",24,1.7143e-05,"Leodia"
2588,"13631;5",23.5,2.4332e-05,"Leodia"
2589,"13631;5",23,8.571e-06,"Leodia"
2590,"13631;5",22.5,5.53e-07,"Leodia"
2603,"13631;5",16,2.77e-07,"Leodia"
2604,"13631;5",15.5,1.3825e-06,"Leodia"
2605,"13631;5",15,8.018e-06,"Leodia"
2606,"13631;5",14.5,4.175e-05,"Leodia"
2607,"13631;5",14,0.00019355,"Leodia"
2608,"13631;5",13.5,0.0007864,"Leodia"
2609,"13631;5",13,0.0027766,"Leodia"
2610,"13631;5",12.5,0.00847,"Leodia"
2611,"13631;5",12,0.022231,"Leodia"
2612,"13631;5",11.5,0.05006,"Leodia"
2613,"13631;5",11,0.09651,"Leodia"
2614,"13631;5",10.5,0.1591,"Leodia"
2615,"13631;5",10,0.22409,"Leodia"
2616,"13631;5",9.5,0.26948,"Leodia"
2617,"13631;5",9,0.2765,"Leodia"
2618,"13631;5",8.5,0.24179,"Leodia"
2619,"13631;5",8,0.17988,"Leodia"
2620,"13631;5",7.5,0.11354,"Leodia"
2621,"13631;5",7,0.06056,"Leodia"
2622,"13631;5",6.5,0.027139,"Leodia"
2623,"13631;5",6,0.01014,"Leodia"
2624,"13631;5",5.5,0.0031269,"Leodia"
2625,"13631;5",5,0.0007855,"Leodia"
2626,"13631;5",4.5,0.00015816,"Leodia"
2627,"13631;5",4,2.4885e-05,"Leodia"
2628,"13631;5",3.5,3.0415e-06,"Leodia"
2629,"13631;5",3,2.77e-07,"Leodia"
2635,"13631;6",54,6.682e-06,"Leodia"
2636,"13631;6",53.5,0.03607,"Leodia"
2637,"13631;6",53,0.17269,"Leodia"
2638,"13631;6",52.5,0.03776,"Leodia"
2639,"13631;6",52,3.985e-05,"Leodia"
2692,"13631;6",25.5,9.55e-07,"Leodia"
2693,"13631;6",25,3.508e-05,"Leodia"
2694,"13631;6",24.5,0.00029471,"Leodia"
2695,"13631;6",24,0.0008786,"Leodia"
2696,"13631;6",23.5,0.0011755,"Leodia"
2697,"13631;6",23,0.0007498,"Leodia"
2698,"13631;6",22.5,0.00022646,"Leodia"
2699,"13631;6",22,2.8874e-05,"Leodia"
2700,"13631;6",21.5,1.9091e-06,"Leodia"
2701,"13631;6",21,2.39e-07,"Leodia"
2702,"13631;6",20.5,2.39e-07,"Leodia"
2703,"13631;6",20,4.77e-07,"Leodia"
2704,"13631;6",19.5,1.9091e-06,"Leodia"
2705,"13631;6",19,6.682e-06,"Leodia"
2706,"13631;6",18.5,2.3863e-05,"Leodia"
2707,"13631;6",18,8.137e-05,"Leodia"
2708,"13631;6",17.5,0.00026321,"Leodia"
2709,"13631;6",17,0.0007935,"Leodia"
2710,"13631;6",16.5,0.0022107,"Leodia"
2711,"13631;6",16,0.005644,"Leodia"
2712,"13631;6",15.5,0.013109,"Leodia"
2713,"13631;6",15,0.027554,"Leodia"
2714,"13631;6",14.5,0.05216,"Leodia"
2715,"13631;6",14,0.08862,"Leodia"
2716,"13631;6",13.5,0.13475,"Leodia"
2717,"13631;6",13,0.18296,"Leodia"
2718,"13631;6",12.5,0.22144,"Leodia"
2719,"13631;6",12,0.23863,"Leodia"
2720,"13631;6",11.5,0.22872,"Leodia"
2721,"13631;6",11,0.19479,"Leodia"
2722,"13631;6",10.5,0.14728,"Leodia"
2723,"13631;6",10,0.09874,"Leodia"
2724,"13631;6",9.5,0.05862,"Leodia"
2725,"13631;6",9,0.030754,"Leodia"
2726,"13631;6",8.5,0.014219,"Leodia"
2727,"13631;6",8,0.005773,"Leodia"
2728,"13631;6",7.5,0.0020479,"Leodia"
2729,"13631;6",7,0.0006309,"Leodia"
2730,"13631;6",6.5,0.00016752,"Leodia"
2731,"13631;6",6,3.794e-05,"Leodia"
2732,"13631;6",5.5,7.159e-06,"Leodia"
2733,"13631;6",5,1.1932e-06,"Leodia"
2734,"13631;6",4.5,2.39e-07,"Leodia"
2740,"13631;7 ave",54,2.3868e-05,"Leodia"
2741,"13631;7 ave",53.5,0.0685,"Leodia"
2742,"13631;7 ave",53,0.16761,"Leodia"
2743,"13631;7 ave",52.5,0.015104,"Leodia"
2744,"13631;7 ave",52,3.593e-06,"Leodia"
2798,"13631;7 ave",25,6.16e-06,"Leodia"
2799,"13631;7 ave",24.5,8.033e-05,"Leodia"
2800,"13631;7 ave",24,0.00029361,"Leodia"
2801,"13631;7 ave",23.5,0.0004009,"Leodia"
2802,"13631;7 ave",23,0.00021558,"Leodia"
2803,"13631;7 ave",22.5,4.389e-05,"Leodia"
2804,"13631;7 ave",22,2.8231e-06,"Leodia"
2811,"13631;7 ave",18.5,2.57e-07,"Leodia"
2812,"13631;7 ave",18,1.7965e-06,"Leodia"
2813,"13631;7 ave",17.5,7.956e-06,"Leodia"
2814,"13631;7 ave",17,3.413e-05,"Leodia"
2815,"13631;7 ave",16.5,0.0001332,"Leodia"
2816,"13631;7 ave",16,0.0004774,"Leodia"
2817,"13631;7 ave",15.5,0.0015489,"Leodia"
2818,"13631;7 ave",15,0.004508,"Leodia"
2819,"13631;7 ave",14.5,0.011692,"Leodia"
2820,"13631;7 ave",14,0.026857,"Leodia"
2821,"13631;7 ave",13.5,0.05441,"Leodia"
2822,"13631;7 ave",13,0.09686,"Leodia"
2823,"13631;7 ave",12.5,0.15115,"Leodia"
2824,"13631;7 ave",12,0.2064,"Leodia"
2825,"13631;7 ave",11.5,0.24631,"Leodia"
2826,"13631;7 ave",11,0.25665,"Leodia"
2827,"13631;7 ave",10.5,0.23332,"Leodia"
2828,"13631;7 ave",10,0.18493,"Leodia"
2829,"13631;7 ave",9.5,0.12767,"Leodia"
2830,"13631;7 ave",9,0.07665,"Leodia"
2831,"13631;7 ave",8.5,0.03994,"Leodia"
2832,"13631;7 ave",8,0.018,"Leodia"
2833,"13631;7 ave",7.5,0.006988,"Leodia"
2834,"13631;7 ave",7,0.0023229,"Leodia"
2835,"13631;7 ave",6.5,0.0006562,"Leodia"
2836,"13631;7 ave",6,0.00015604,"Leodia"
2837,"13631;7 ave",5.5,3.0798e-05,"Leodia"
2838,"13631;7 ave",5,4.876e-06,"Leodia"
2839,"13631;7 ave",4.5,7.7e-07,"Leodia"
2846,"13631;8",54,2.3868e-05,"Leodia"
2847,"13631;8",53.5,0.0685,"Leodia"
2848,"13631;8",53,0.16761,"Leodia"
2849,"13631;8",52.5,0.015104,"Leodia"
2850,"13631;8",52,3.593e-06,"Leodia"
2904,"13631;8",25,6.16e-06,"Leodia"
2905,"13631;8",24.5,8.033e-05,"Leodia"
2906,"13631;8",24,0.00029361,"Leodia"
2907,"13631;8",23.5,0.0004009,"Leodia"
2908,"13631;8",23,0.00021558,"Leodia"
2909,"13631;8",22.5,4.389e-05,"Leodia"
2910,"13631;8",22,2.8231e-06,"Leodia"
2917,"13631;8",18.5,2.57e-07,"Leodia"
2918,"13631;8",18,1.7965e-06,"Leodia"
2919,"13631;8",17.5,7.956e-06,"Leodia"
2920,"13631;8",17,3.413e-05,"Leodia"
2921,"13631;8",16.5,0.0001332,"Leodia"
2922,"13631;8",16,0.0004774,"Leodia"
2923,"13631;8",15.5,0.0015489,"Leodia"
2924,"13631;8",15,0.004508,"Leodia"
2925,"13631;8",14.5,0.011692,"Leodia"
2926,"13631;8",14,0.026857,"Leodia"
2927,"13631;8",13.5,0.05441,"Leodia"
2928,"13631;8",13,0.09686,"Leodia"
2929,"13631;8",12.5,0.15115,"Leodia"
2930,"13631;8",12,0.2064,"Leodia"
2931,"13631;8",11.5,0.24631,"Leodia"
2932,"13631;8",11,0.25665,"Leodia"
2933,"13631;8",10.5,0.23332,"Leodia"
2934,"13631;8",10,0.18493,"Leodia"
2935,"13631;8",9.5,0.12767,"Leodia"
2936,"13631;8",9,0.07665,"Leodia"
2937,"13631;8",8.5,0.03994,"Leodia"
2938,"13631;8",8,0.018,"Leodia"
2939,"13631;8",7.5,0.006988,"Leodia"
2940,"13631;8",7,0.0023229,"Leodia"
2941,"13631;8",6.5,0.0006562,"Leodia"
2942,"13631;8",6,0.00015604,"Leodia"
2943,"13631;8",5.5,3.0798e-05,"Leodia"
2944,"13631;8",5,4.876e-06,"Leodia"
2945,"13631;8",4.5,7.7e-07,"Leodia"
2951,"13631;9",54,1.99e-07,"Leodia"
2952,"13631;9",53.5,0.004308,"Leodia"
2953,"13631;9",53,0.08781,"Leodia"
2954,"13631;9",52.5,0.12782,"Leodia"
2955,"13631;9",52,0.00326,"Leodia"
2956,"13631;9",51.5,5.98e-07,"Leodia"
3007,"13631;9",26,4.982e-06,"Leodia"
3008,"13631;9",25.5,0.00013951,"Leodia"
3009,"13631;9",25,0.0011898,"Leodia"
3010,"13631;9",24.5,0.004186,"Leodia"
3011,"13631;9",24,0.008148,"Leodia"
3012,"13631;9",23.5,0.010236,"Leodia"
3013,"13631;9",23,0.008847,"Leodia"
3014,"13631;9",22.5,0.005427,"Leodia"
3015,"13631;9",22,0.0023473,"Leodia"
3016,"13631;9",21.5,0.000834,"Leodia"
3017,"13631;9",21,0.0004022,"Leodia"
3018,"13631;9",20.5,0.000504,"Leodia"
3019,"13631;9",20,0.0011483,"Leodia"
3020,"13631;9",19.5,0.0025211,"Leodia"
3021,"13631;9",19,0.005284,"Leodia"
3022,"13631;9",18.5,0.010488,"Leodia"
3023,"13631;9",18,0.019584,"Leodia"
3024,"13631;9",17.5,0.03422,"Leodia"
3025,"13631;9",17,0.05569,"Leodia"
3026,"13631;9",16.5,0.08412,"Leodia"
3027,"13631;9",16,0.1176,"Leodia"
3028,"13631;9",15.5,0.15183,"Leodia"
3029,"13631;9",15,0.18068,"Leodia"
3030,"13631;9",14.5,0.1979,"Leodia"
3031,"13631;9",14,0.19929,"Leodia"
3032,"13631;9",13.5,0.18433,"Leodia"
3033,"13631;9",13,0.15645,"Leodia"
3034,"13631;9",12.5,0.12176,"Leodia"
3035,"13631;9",12,0.08682,"Leodia"
3036,"13631;9",11.5,0.05667,"Leodia"
3037,"13631;9",11,0.03382,"Leodia"
3038,"13631;9",10.5,0.01843,"Leodia"
3039,"13631;9",10,0.009156,"Leodia"
3040,"13631;9",9.5,0.004137,"Leodia"
3041,"13631;9",9,0.001696,"Leodia"
3042,"13631;9",8.5,0.0006286,"Leodia"
3043,"13631;9",8,0.00020966,"Leodia"
3044,"13631;9",7.5,6.258e-05,"Leodia"
3045,"13631;9",7,1.6741e-05,"Leodia"
3046,"13631;9",6.5,3.986e-06,"Leodia"
3047,"13631;9",6,7.97e-07,"Leodia"
3048,"13631;9",5.5,1.99e-07,"Leodia"
3052,"15140AA;Casebolt 33-27",350.5,2.28e-08,"Tucetona"
3053,"15140AA;Casebolt 33-27",350,2.28e-08,"Tucetona"
3054,"15140AA;Casebolt 33-27",349.5,2.28e-08,"Tucetona"
3055,"15140AA;Casebolt 33-27",349,2.28e-08,"Tucetona"
3056,"15140AA;Casebolt 33-27",348.5,2.28e-08,"Tucetona"
3057,"15140AA;Casebolt 33-27",348,2.28e-08,"Tucetona"
3058,"15140AA;Casebolt 33-27",347.5,4.56e-08,"Tucetona"
3059,"15140AA;Casebolt 33-27",347,4.56e-08,"Tucetona"
3060,"15140AA;Casebolt 33-27",346.5,4.56e-08,"Tucetona"
3061,"15140AA;Casebolt 33-27",346,4.56e-08,"Tucetona"
3062,"15140AA;Casebolt 33-27",345.5,6.84e-08,"Tucetona"
3063,"15140AA;Casebolt 33-27",345,6.84e-08,"Tucetona"
3064,"15140AA;Casebolt 33-27",344.5,6.84e-08,"Tucetona"
3065,"15140AA;Casebolt 33-27",344,9.12e-08,"Tucetona"
3066,"15140AA;Casebolt 33-27",343.5,9.12e-08,"Tucetona"
3067,"15140AA;Casebolt 33-27",343,1.14e-07,"Tucetona"
3068,"15140AA;Casebolt 33-27",342.5,1.14e-07,"Tucetona"
3069,"15140AA;Casebolt 33-27",342,1.37e-07,"Tucetona"
3070,"15140AA;Casebolt 33-27",341.5,1.6e-07,"Tucetona"
3071,"15140AA;Casebolt 33-27",341,1.82e-07,"Tucetona"
3072,"15140AA;Casebolt 33-27",340.5,1.82e-07,"Tucetona"
3073,"15140AA;Casebolt 33-27",340,2.05e-07,"Tucetona"
3074,"15140AA;Casebolt 33-27",339.5,2.28e-07,"Tucetona"
3075,"15140AA;Casebolt 33-27",339,2.51e-07,"Tucetona"
3076,"15140AA;Casebolt 33-27",338.5,2.74e-07,"Tucetona"
3077,"15140AA;Casebolt 33-27",338,2.96e-07,"Tucetona"
3078,"15140AA;Casebolt 33-27",337.5,3.19e-07,"Tucetona"
3079,"15140AA;Casebolt 33-27",337,3.42e-07,"Tucetona"
3080,"15140AA;Casebolt 33-27",336.5,3.88e-07,"Tucetona"
3081,"15140AA;Casebolt 33-27",336,4.1e-07,"Tucetona"
3082,"15140AA;Casebolt 33-27",335.5,4.56e-07,"Tucetona"
3083,"15140AA;Casebolt 33-27",335,5.02e-07,"Tucetona"
3084,"15140AA;Casebolt 33-27",334.5,5.47e-07,"Tucetona"
3085,"15140AA;Casebolt 33-27",334,5.93e-07,"Tucetona"
3086,"15140AA;Casebolt 33-27",333.5,6.61e-07,"Tucetona"
3087,"15140AA;Casebolt 33-27",333,7.07e-07,"Tucetona"
3088,"15140AA;Casebolt 33-27",332.5,7.75e-07,"Tucetona"
3089,"15140AA;Casebolt 33-27",332,8.67e-07,"Tucetona"
3090,"15140AA;Casebolt 33-27",331.5,9.58e-07,"Tucetona"
3091,"15140AA;Casebolt 33-27",331,1.0489e-06,"Tucetona"
3092,"15140AA;Casebolt 33-27",330.5,1.1401e-06,"Tucetona"
3093,"15140AA;Casebolt 33-27",330,1.2541e-06,"Tucetona"
3094,"15140AA;Casebolt 33-27",329.5,1.391e-06,"Tucetona"
3095,"15140AA;Casebolt 33-27",329,1.5278e-06,"Tucetona"
3096,"15140AA;Casebolt 33-27",328.5,1.6874e-06,"Tucetona"
3097,"15140AA;Casebolt 33-27",328,1.8698e-06,"Tucetona"
3098,"15140AA;Casebolt 33-27",327.5,2.075e-06,"Tucetona"
3099,"15140AA;Casebolt 33-27",327,2.2803e-06,"Tucetona"
3100,"15140AA;Casebolt 33-27",326.5,2.5083e-06,"Tucetona"
3101,"15140AA;Casebolt 33-27",326,2.7591e-06,"Tucetona"
3102,"15140AA;Casebolt 33-27",325.5,3.0327e-06,"Tucetona"
3103,"15140AA;Casebolt 33-27",325,3.329e-06,"Tucetona"
3104,"15140AA;Casebolt 33-27",324.5,3.671e-06,"Tucetona"
3105,"15140AA;Casebolt 33-27",324,4.036e-06,"Tucetona"
3106,"15140AA;Casebolt 33-27",323.5,4.446e-06,"Tucetona"
3107,"15140AA;Casebolt 33-27",323,4.857e-06,"Tucetona"
3108,"15140AA;Casebolt 33-27",322.5,5.336e-06,"Tucetona"
3109,"15140AA;Casebolt 33-27",322,5.837e-06,"Tucetona"
3110,"15140AA;Casebolt 33-27",321.5,6.385e-06,"Tucetona"
3111,"15140AA;Casebolt 33-27",321,6.955e-06,"Tucetona"
3112,"15140AA;Casebolt 33-27",320.5,7.57e-06,"Tucetona"
3113,"15140AA;Casebolt 33-27",320,8.232e-06,"Tucetona"
3114,"15140AA;Casebolt 33-27",319.5,8.939e-06,"Tucetona"
3115,"15140AA;Casebolt 33-27",319,9.691e-06,"Tucetona"
3116,"15140AA;Casebolt 33-27",318.5,1.0489e-05,"Tucetona"
3117,"15140AA;Casebolt 33-27",318,1.1333e-05,"Tucetona"
3118,"15140AA;Casebolt 33-27",317.5,1.2268e-05,"Tucetona"
3119,"15140AA;Casebolt 33-27",317,1.3248e-05,"Tucetona"
3120,"15140AA;Casebolt 33-27",316.5,1.432e-05,"Tucetona"
3121,"15140AA;Casebolt 33-27",316,1.546e-05,"Tucetona"
3122,"15140AA;Casebolt 33-27",315.5,1.6737e-05,"Tucetona"
3123,"15140AA;Casebolt 33-27",315,1.8105e-05,"Tucetona"
3124,"15140AA;Casebolt 33-27",314.5,1.9587e-05,"Tucetona"
3125,"15140AA;Casebolt 33-27",314,2.1206e-05,"Tucetona"
3126,"15140AA;Casebolt 33-27",313.5,2.2917e-05,"Tucetona"
3127,"15140AA;Casebolt 33-27",313,2.4764e-05,"Tucetona"
3128,"15140AA;Casebolt 33-27",312.5,2.6702e-05,"Tucetona"
3129,"15140AA;Casebolt 33-27",312,2.8731e-05,"Tucetona"
3130,"15140AA;Casebolt 33-27",311.5,3.0829e-05,"Tucetona"
3131,"15140AA;Casebolt 33-27",311,3.3e-05,"Tucetona"
3132,"15140AA;Casebolt 33-27",310.5,3.521e-05,"Tucetona"
3133,"15140AA;Casebolt 33-27",310,3.746e-05,"Tucetona"
3134,"15140AA;Casebolt 33-27",309.5,3.977e-05,"Tucetona"
3135,"15140AA;Casebolt 33-27",309,4.212e-05,"Tucetona"
3136,"15140AA;Casebolt 33-27",308.5,4.458e-05,"Tucetona"
3137,"15140AA;Casebolt 33-27",308,4.711e-05,"Tucetona"
3138,"15140AA;Casebolt 33-27",307.5,4.978e-05,"Tucetona"
3139,"15140AA;Casebolt 33-27",307,5.256e-05,"Tucetona"
3140,"15140AA;Casebolt 33-27",306.5,5.555e-05,"Tucetona"
3141,"15140AA;Casebolt 33-27",306,5.874e-05,"Tucetona"
3142,"15140AA;Casebolt 33-27",305.5,6.216e-05,"Tucetona"
3143,"15140AA;Casebolt 33-27",305,6.579e-05,"Tucetona"
3144,"15140AA;Casebolt 33-27",304.5,6.964e-05,"Tucetona"
3145,"15140AA;Casebolt 33-27",304,7.37e-05,"Tucetona"
3146,"15140AA;Casebolt 33-27",303.5,7.794e-05,"Tucetona"
3147,"15140AA;Casebolt 33-27",303,8.241e-05,"Tucetona"
3148,"15140AA;Casebolt 33-27",302.5,8.704e-05,"Tucetona"
3149,"15140AA;Casebolt 33-27",302,9.185e-05,"Tucetona"
3150,"15140AA;Casebolt 33-27",301.5,9.68e-05,"Tucetona"
3151,"15140AA;Casebolt 33-27",301,0.00010188,"Tucetona"
3152,"15140AA;Casebolt 33-27",300.5,0.00010717,"Tucetona"
3153,"15140AA;Casebolt 33-27",300,0.00011274,"Tucetona"
3154,"15140AA;Casebolt 33-27",299.5,0.00011855,"Tucetona"
3155,"15140AA;Casebolt 33-27",299,0.00012455,"Tucetona"
3156,"15140AA;Casebolt 33-27",298.5,0.00013073,"Tucetona"
3157,"15140AA;Casebolt 33-27",298,0.000137,"Tucetona"
3158,"15140AA;Casebolt 33-27",297.5,0.00014327,"Tucetona"
3159,"15140AA;Casebolt 33-27",297,0.00014952,"Tucetona"
3160,"15140AA;Casebolt 33-27",296.5,0.00015563,"Tucetona"
3161,"15140AA;Casebolt 33-27",296,0.00016149,"Tucetona"
3162,"15140AA;Casebolt 33-27",295.5,0.0001671,"Tucetona"
3163,"15140AA;Casebolt 33-27",295,0.00017246,"Tucetona"
3164,"15140AA;Casebolt 33-27",294.5,0.00017759,"Tucetona"
3165,"15140AA;Casebolt 33-27",294,0.00018251,"Tucetona"
3166,"15140AA;Casebolt 33-27",293.5,0.00018721,"Tucetona"
3167,"15140AA;Casebolt 33-27",293,0.00019172,"Tucetona"
3168,"15140AA;Casebolt 33-27",292.5,0.00019606,"Tucetona"
3169,"15140AA;Casebolt 33-27",292,0.00020023,"Tucetona"
3170,"15140AA;Casebolt 33-27",291.5,0.00020429,"Tucetona"
3171,"15140AA;Casebolt 33-27",291,0.00020823,"Tucetona"
3172,"15140AA;Casebolt 33-27",290.5,0.00021213,"Tucetona"
3173,"15140AA;Casebolt 33-27",290,0.00021589,"Tucetona"
3174,"15140AA;Casebolt 33-27",289.5,0.0002195,"Tucetona"
3175,"15140AA;Casebolt 33-27",289,0.00022289,"Tucetona"
3176,"15140AA;Casebolt 33-27",288.5,0.00022604,"Tucetona"
3177,"15140AA;Casebolt 33-27",288,0.00022887,"Tucetona"
3178,"15140AA;Casebolt 33-27",287.5,0.00023131,"Tucetona"
3179,"15140AA;Casebolt 33-27",287,0.00023334,"Tucetona"
3180,"15140AA;Casebolt 33-27",286.5,0.00023489,"Tucetona"
3181,"15140AA;Casebolt 33-27",286,0.00023589,"Tucetona"
3182,"15140AA;Casebolt 33-27",285.5,0.00023621,"Tucetona"
3183,"15140AA;Casebolt 33-27",285,0.00023578,"Tucetona"
3184,"15140AA;Casebolt 33-27",284.5,0.00023473,"Tucetona"
3185,"15140AA;Casebolt 33-27",284,0.00023322,"Tucetona"
3186,"15140AA;Casebolt 33-27",283.5,0.00023138,"Tucetona"
3187,"15140AA;Casebolt 33-27",283,0.00022932,"Tucetona"
3188,"15140AA;Casebolt 33-27",282.5,0.0002272,"Tucetona"
3189,"15140AA;Casebolt 33-27",282,0.00022513,"Tucetona"
3190,"15140AA;Casebolt 33-27",281.5,0.00022326,"Tucetona"
3191,"15140AA;Casebolt 33-27",281,0.00022169,"Tucetona"
3192,"15140AA;Casebolt 33-27",280.5,0.00022029,"Tucetona"
3193,"15140AA;Casebolt 33-27",280,0.00021893,"Tucetona"
3194,"15140AA;Casebolt 33-27",279.5,0.00021758,"Tucetona"
3195,"15140AA;Casebolt 33-27",279,0.00021621,"Tucetona"
3196,"15140AA;Casebolt 33-27",278.5,0.00021487,"Tucetona"
3197,"15140AA;Casebolt 33-27",278,0.00021352,"Tucetona"
3198,"15140AA;Casebolt 33-27",277.5,0.0002122,"Tucetona"
3199,"15140AA;Casebolt 33-27",277,0.00021088,"Tucetona"
3200,"15140AA;Casebolt 33-27",276.5,0.00020955,"Tucetona"
3201,"15140AA;Casebolt 33-27",276,0.00020823,"Tucetona"
3202,"15140AA;Casebolt 33-27",275.5,0.00020689,"Tucetona"
3203,"15140AA;Casebolt 33-27",275,0.00020543,"Tucetona"
3204,"15140AA;Casebolt 33-27",274.5,0.00020395,"Tucetona"
3205,"15140AA;Casebolt 33-27",274,0.00020246,"Tucetona"
3206,"15140AA;Casebolt 33-27",273.5,0.000201,"Tucetona"
3207,"15140AA;Casebolt 33-27",273,0.00019964,"Tucetona"
3208,"15140AA;Casebolt 33-27",272.5,0.00019836,"Tucetona"
3209,"15140AA;Casebolt 33-27",272,0.00019722,"Tucetona"
3210,"15140AA;Casebolt 33-27",271.5,0.00019626,"Tucetona"
3211,"15140AA;Casebolt 33-27",271,0.00019553,"Tucetona"
3212,"15140AA;Casebolt 33-27",270.5,0.00019498,"Tucetona"
3213,"15140AA;Casebolt 33-27",270,0.00019455,"Tucetona"
3214,"15140AA;Casebolt 33-27",269.5,0.00019425,"Tucetona"
3215,"15140AA;Casebolt 33-27",269,0.00019405,"Tucetona"
3216,"15140AA;Casebolt 33-27",268.5,0.000194,"Tucetona"
3217,"15140AA;Casebolt 33-27",268,0.00019405,"Tucetona"
3218,"15140AA;Casebolt 33-27",267.5,0.00019425,"Tucetona"
3219,"15140AA;Casebolt 33-27",267,0.00019455,"Tucetona"
3220,"15140AA;Casebolt 33-27",266.5,0.00019498,"Tucetona"
3221,"15140AA;Casebolt 33-27",266,0.00019553,"Tucetona"
3222,"15140AA;Casebolt 33-27",265.5,0.00019622,"Tucetona"
3223,"15140AA;Casebolt 33-27",265,0.00019701,"Tucetona"
3224,"15140AA;Casebolt 33-27",264.5,0.00019795,"Tucetona"
3225,"15140AA;Casebolt 33-27",264,0.00019902,"Tucetona"
3226,"15140AA;Casebolt 33-27",263.5,0.00020021,"Tucetona"
3227,"15140AA;Casebolt 33-27",263,0.00020155,"Tucetona"
3228,"15140AA;Casebolt 33-27",262.5,0.00020301,"Tucetona"
3229,"15140AA;Casebolt 33-27",262,0.00020461,"Tucetona"
3230,"15140AA;Casebolt 33-27",261.5,0.00020636,"Tucetona"
3231,"15140AA;Casebolt 33-27",261,0.00020823,"Tucetona"
3232,"15140AA;Casebolt 33-27",260.5,0.00021033,"Tucetona"
3233,"15140AA;Casebolt 33-27",260,0.00021268,"Tucetona"
3234,"15140AA;Casebolt 33-27",259.5,0.00021523,"Tucetona"
3235,"15140AA;Casebolt 33-27",259,0.00021795,"Tucetona"
3236,"15140AA;Casebolt 33-27",258.5,0.00022082,"Tucetona"
3237,"15140AA;Casebolt 33-27",258,0.00022378,"Tucetona"
3238,"15140AA;Casebolt 33-27",257.5,0.00022684,"Tucetona"
3239,"15140AA;Casebolt 33-27",257,0.00022989,"Tucetona"
3240,"15140AA;Casebolt 33-27",256.5,0.00023293,"Tucetona"
3241,"15140AA;Casebolt 33-27",256,0.00023589,"Tucetona"
3242,"15140AA;Casebolt 33-27",255.5,0.00023897,"Tucetona"
3243,"15140AA;Casebolt 33-27",255,0.00024228,"Tucetona"
3244,"15140AA;Casebolt 33-27",254.5,0.00024577,"Tucetona"
3245,"15140AA;Casebolt 33-27",254,0.00024932,"Tucetona"
3246,"15140AA;Casebolt 33-27",253.5,0.00025286,"Tucetona"
3247,"15140AA;Casebolt 33-27",253,0.00025628,"Tucetona"
3248,"15140AA;Casebolt 33-27",252.5,0.00025949,"Tucetona"
3249,"15140AA;Casebolt 33-27",252,0.00026239,"Tucetona"
3250,"15140AA;Casebolt 33-27",251.5,0.00026485,"Tucetona"
3251,"15140AA;Casebolt 33-27",251,0.00026679,"Tucetona"
3252,"15140AA;Casebolt 33-27",250.5,0.00026811,"Tucetona"
3253,"15140AA;Casebolt 33-27",250,0.00026889,"Tucetona"
3254,"15140AA;Casebolt 33-27",249.5,0.00026921,"Tucetona"
3255,"15140AA;Casebolt 33-27",249,0.00026914,"Tucetona"
3256,"15140AA;Casebolt 33-27",248.5,0.00026884,"Tucetona"
3257,"15140AA;Casebolt 33-27",248,0.00026836,"Tucetona"
3258,"15140AA;Casebolt 33-27",247.5,0.00026782,"Tucetona"
3259,"15140AA;Casebolt 33-27",247,0.00026731,"Tucetona"
3260,"15140AA;Casebolt 33-27",246.5,0.00026695,"Tucetona"
3261,"15140AA;Casebolt 33-27",246,0.00026679,"Tucetona"
3262,"15140AA;Casebolt 33-27",245.5,0.00026665,"Tucetona"
3263,"15140AA;Casebolt 33-27",245,0.00026626,"Tucetona"
3264,"15140AA;Casebolt 33-27",244.5,0.00026576,"Tucetona"
3265,"15140AA;Casebolt 33-27",244,0.00026524,"Tucetona"
3266,"15140AA;Casebolt 33-27",243.5,0.00026476,"Tucetona"
3267,"15140AA;Casebolt 33-27",243,0.00026444,"Tucetona"
3268,"15140AA;Casebolt 33-27",242.5,0.00026439,"Tucetona"
3269,"15140AA;Casebolt 33-27",242,0.00026471,"Tucetona"
3270,"15140AA;Casebolt 33-27",241.5,0.00026547,"Tucetona"
3271,"15140AA;Casebolt 33-27",241,0.00026679,"Tucetona"
3272,"15140AA;Casebolt 33-27",240.5,0.00026902,"Tucetona"
3273,"15140AA;Casebolt 33-27",240,0.00027233,"Tucetona"
3274,"15140AA;Casebolt 33-27",239.5,0.00027639,"Tucetona"
3275,"15140AA;Casebolt 33-27",239,0.00028095,"Tucetona"
3276,"15140AA;Casebolt 33-27",238.5,0.00028572,"Tucetona"
3277,"15140AA;Casebolt 33-27",238,0.00029037,"Tucetona"
3278,"15140AA;Casebolt 33-27",237.5,0.00029461,"Tucetona"
3279,"15140AA;Casebolt 33-27",237,0.00029805,"Tucetona"
3280,"15140AA;Casebolt 33-27",236.5,0.0003004,"Tucetona"
3281,"15140AA;Casebolt 33-27",236,0.00030124,"Tucetona"
3282,"15140AA;Casebolt 33-27",235.5,0.00030079,"Tucetona"
3283,"15140AA;Casebolt 33-27",235,0.00029951,"Tucetona"
3284,"15140AA;Casebolt 33-27",234.5,0.00029741,"Tucetona"
3285,"15140AA;Casebolt 33-27",234,0.00029463,"Tucetona"
3286,"15140AA;Casebolt 33-27",233.5,0.00029117,"Tucetona"
3287,"15140AA;Casebolt 33-27",233,0.00028715,"Tucetona"
3288,"15140AA;Casebolt 33-27",232.5,0.00028264,"Tucetona"
3289,"15140AA;Casebolt 33-27",232,0.00027769,"Tucetona"
3290,"15140AA;Casebolt 33-27",231.5,0.00027238,"Tucetona"
3291,"15140AA;Casebolt 33-27",231,0.00026679,"Tucetona"
3292,"15140AA;Casebolt 33-27",230.5,0.00026047,"Tucetona"
3293,"15140AA;Casebolt 33-27",230,0.00025315,"Tucetona"
3294,"15140AA;Casebolt 33-27",229.5,0.0002452,"Tucetona"
3295,"15140AA;Casebolt 33-27",229,0.00023694,"Tucetona"
3296,"15140AA;Casebolt 33-27",228.5,0.00022869,"Tucetona"
3297,"15140AA;Casebolt 33-27",228,0.00022068,"Tucetona"
3298,"15140AA;Casebolt 33-27",227.5,0.00021318,"Tucetona"
3299,"15140AA;Casebolt 33-27",227,0.00020636,"Tucetona"
3300,"15140AA;Casebolt 33-27",226.5,0.00020043,"Tucetona"
3301,"15140AA;Casebolt 33-27",226,0.00019553,"Tucetona"
3302,"15140AA;Casebolt 33-27",225.5,0.00019138,"Tucetona"
3303,"15140AA;Casebolt 33-27",225,0.00018757,"Tucetona"
3304,"15140AA;Casebolt 33-27",224.5,0.00018415,"Tucetona"
3305,"15140AA;Casebolt 33-27",224,0.00018112,"Tucetona"
3306,"15140AA;Casebolt 33-27",223.5,0.0001785,"Tucetona"
3307,"15140AA;Casebolt 33-27",223,0.00017629,"Tucetona"
3308,"15140AA;Casebolt 33-27",222.5,0.00017453,"Tucetona"
3309,"15140AA;Casebolt 33-27",222,0.00017325,"Tucetona"
3310,"15140AA;Casebolt 33-27",221.5,0.00017246,"Tucetona"
3311,"15140AA;Casebolt 33-27",221,0.0001722,"Tucetona"
3312,"15140AA;Casebolt 33-27",220.5,0.00017241,"Tucetona"
3313,"15140AA;Casebolt 33-27",220,0.00017307,"Tucetona"
3314,"15140AA;Casebolt 33-27",219.5,0.00017419,"Tucetona"
3315,"15140AA;Casebolt 33-27",219,0.00017576,"Tucetona"
3316,"15140AA;Casebolt 33-27",218.5,0.00017779,"Tucetona"
3317,"15140AA;Casebolt 33-27",218,0.0001803,"Tucetona"
3318,"15140AA;Casebolt 33-27",217.5,0.00018329,"Tucetona"
3319,"15140AA;Casebolt 33-27",217,0.00018682,"Tucetona"
3320,"15140AA;Casebolt 33-27",216.5,0.0001909,"Tucetona"
3321,"15140AA;Casebolt 33-27",216,0.00019553,"Tucetona"
3322,"15140AA;Casebolt 33-27",215.5,0.00020089,"Tucetona"
3323,"15140AA;Casebolt 33-27",215,0.00020709,"Tucetona"
3324,"15140AA;Casebolt 33-27",214.5,0.00021409,"Tucetona"
3325,"15140AA;Casebolt 33-27",214,0.00022191,"Tucetona"
3326,"15140AA;Casebolt 33-27",213.5,0.00023046,"Tucetona"
3327,"15140AA;Casebolt 33-27",213,0.00023979,"Tucetona"
3328,"15140AA;Casebolt 33-27",212.5,0.0002498,"Tucetona"
3329,"15140AA;Casebolt 33-27",212,0.00026047,"Tucetona"
3330,"15140AA;Casebolt 33-27",211.5,0.00027174,"Tucetona"
3331,"15140AA;Casebolt 33-27",211,0.00028355,"Tucetona"
3332,"15140AA;Casebolt 33-27",210.5,0.00029618,"Tucetona"
3333,"15140AA;Casebolt 33-27",210,0.00030993,"Tucetona"
3334,"15140AA;Casebolt 33-27",209.5,0.0003248,"Tucetona"
3335,"15140AA;Casebolt 33-27",209,0.0003407,"Tucetona"
3336,"15140AA;Casebolt 33-27",208.5,0.0003577,"Tucetona"
3337,"15140AA;Casebolt 33-27",208,0.0003756,"Tucetona"
3338,"15140AA;Casebolt 33-27",207.5,0.0003944,"Tucetona"
3339,"15140AA;Casebolt 33-27",207,0.000414,"Tucetona"
3340,"15140AA;Casebolt 33-27",206.5,0.0004342,"Tucetona"
3341,"15140AA;Casebolt 33-27",206,0.000455,"Tucetona"
3342,"15140AA;Casebolt 33-27",205.5,0.0004762,"Tucetona"
3343,"15140AA;Casebolt 33-27",205,0.0004981,"Tucetona"
3344,"15140AA;Casebolt 33-27",204.5,0.0005207,"Tucetona"
3345,"15140AA;Casebolt 33-27",204,0.0005442,"Tucetona"
3346,"15140AA;Casebolt 33-27",203.5,0.0005687,"Tucetona"
3347,"15140AA;Casebolt 33-27",203,0.0005943,"Tucetona"
3348,"15140AA;Casebolt 33-27",202.5,0.0006212,"Tucetona"
3349,"15140AA;Casebolt 33-27",202,0.0006496,"Tucetona"
3350,"15140AA;Casebolt 33-27",201.5,0.0006795,"Tucetona"
3351,"15140AA;Casebolt 33-27",201,0.0007113,"Tucetona"
3352,"15140AA;Casebolt 33-27",200.5,0.0007453,"Tucetona"
3353,"15140AA;Casebolt 33-27",200,0.0007817,"Tucetona"
3354,"15140AA;Casebolt 33-27",199.5,0.0008204,"Tucetona"
3355,"15140AA;Casebolt 33-27",199,0.0008613,"Tucetona"
3356,"15140AA;Casebolt 33-27",198.5,0.0009042,"Tucetona"
3357,"15140AA;Casebolt 33-27",198,0.0009489,"Tucetona"
3358,"15140AA;Casebolt 33-27",197.5,0.0009952,"Tucetona"
3359,"15140AA;Casebolt 33-27",197,0.0010427,"Tucetona"
3360,"15140AA;Casebolt 33-27",196.5,0.0010911,"Tucetona"
3361,"15140AA;Casebolt 33-27",196,0.0011401,"Tucetona"
3362,"15140AA;Casebolt 33-27",195.5,0.00119,"Tucetona"
3363,"15140AA;Casebolt 33-27",195,0.0012415,"Tucetona"
3364,"15140AA;Casebolt 33-27",194.5,0.0012945,"Tucetona"
3365,"15140AA;Casebolt 33-27",194,0.0013488,"Tucetona"
3366,"15140AA;Casebolt 33-27",193.5,0.0014041,"Tucetona"
3367,"15140AA;Casebolt 33-27",193,0.0014602,"Tucetona"
3368,"15140AA;Casebolt 33-27",192.5,0.0015169,"Tucetona"
3369,"15140AA;Casebolt 33-27",192,0.0015738,"Tucetona"
3370,"15140AA;Casebolt 33-27",191.5,0.0016306,"Tucetona"
3371,"15140AA;Casebolt 33-27",191,0.0016869,"Tucetona"
3372,"15140AA;Casebolt 33-27",190.5,0.0017424,"Tucetona"
3373,"15140AA;Casebolt 33-27",190,0.0017971,"Tucetona"
3374,"15140AA;Casebolt 33-27",189.5,0.0018511,"Tucetona"
3375,"15140AA;Casebolt 33-27",189,0.0019046,"Tucetona"
3376,"15140AA;Casebolt 33-27",188.5,0.0019577,"Tucetona"
3377,"15140AA;Casebolt 33-27",188,0.0020107,"Tucetona"
3378,"15140AA;Casebolt 33-27",187.5,0.0020636,"Tucetona"
3379,"15140AA;Casebolt 33-27",187,0.0021168,"Tucetona"
3380,"15140AA;Casebolt 33-27",186.5,0.0021705,"Tucetona"
3381,"15140AA;Casebolt 33-27",186,0.002225,"Tucetona"
3382,"15140AA;Casebolt 33-27",185.5,0.0022814,"Tucetona"
3383,"15140AA;Casebolt 33-27",185,0.0023401,"Tucetona"
3384,"15140AA;Casebolt 33-27",184.5,0.0024001,"Tucetona"
3385,"15140AA;Casebolt 33-27",184,0.0024607,"Tucetona"
3386,"15140AA;Casebolt 33-27",183.5,0.0025206,"Tucetona"
3387,"15140AA;Casebolt 33-27",183,0.002579,"Tucetona"
3388,"15140AA;Casebolt 33-27",182.5,0.0026344,"Tucetona"
3389,"15140AA;Casebolt 33-27",182,0.0026859,"Tucetona"
3390,"15140AA;Casebolt 33-27",181.5,0.0027319,"Tucetona"
3391,"15140AA;Casebolt 33-27",181,0.0027714,"Tucetona"
3392,"15140AA;Casebolt 33-27",180.5,0.0028021,"Tucetona"
3393,"15140AA;Casebolt 33-27",180,0.0028241,"Tucetona"
3394,"15140AA;Casebolt 33-27",179.5,0.0028389,"Tucetona"
3395,"15140AA;Casebolt 33-27",179,0.0028483,"Tucetona"
3396,"15140AA;Casebolt 33-27",178.5,0.0028541,"Tucetona"
3397,"15140AA;Casebolt 33-27",178,0.002858,"Tucetona"
3398,"15140AA;Casebolt 33-27",177.5,0.002862,"Tucetona"
3399,"15140AA;Casebolt 33-27",177,0.0028678,"Tucetona"
3400,"15140AA;Casebolt 33-27",176.5,0.0028773,"Tucetona"
3401,"15140AA;Casebolt 33-27",176,0.0028923,"Tucetona"
3402,"15140AA;Casebolt 33-27",175.5,0.0029107,"Tucetona"
3403,"15140AA;Casebolt 33-27",175,0.0029293,"Tucetona"
3404,"15140AA;Casebolt 33-27",174.5,0.0029487,"Tucetona"
3405,"15140AA;Casebolt 33-27",174,0.0029692,"Tucetona"
3406,"15140AA;Casebolt 33-27",173.5,0.0029915,"Tucetona"
3407,"15140AA;Casebolt 33-27",173,0.0030159,"Tucetona"
3408,"15140AA;Casebolt 33-27",172.5,0.0030432,"Tucetona"
3409,"15140AA;Casebolt 33-27",172,0.0030736,"Tucetona"
3410,"15140AA;Casebolt 33-27",171.5,0.0031078,"Tucetona"
3411,"15140AA;Casebolt 33-27",171,0.0031464,"Tucetona"
3412,"15140AA;Casebolt 33-27",170.5,0.003192,"Tucetona"
3413,"15140AA;Casebolt 33-27",170,0.003247,"Tucetona"
3414,"15140AA;Casebolt 33-27",169.5,0.003308,"Tucetona"
3415,"15140AA;Casebolt 33-27",169,0.003374,"Tucetona"
3416,"15140AA;Casebolt 33-27",168.5,0.003441,"Tucetona"
3417,"15140AA;Casebolt 33-27",168,0.003509,"Tucetona"
3418,"15140AA;Casebolt 33-27",167.5,0.003574,"Tucetona"
3419,"15140AA;Casebolt 33-27",167,0.003634,"Tucetona"
3420,"15140AA;Casebolt 33-27",166.5,0.003686,"Tucetona"
3421,"15140AA;Casebolt 33-27",166,0.003729,"Tucetona"
3422,"15140AA;Casebolt 33-27",165.5,0.00376,"Tucetona"
3423,"15140AA;Casebolt 33-27",165,0.003782,"Tucetona"
3424,"15140AA;Casebolt 33-27",164.5,0.003797,"Tucetona"
3425,"15140AA;Casebolt 33-27",164,0.003806,"Tucetona"
3426,"15140AA;Casebolt 33-27",163.5,0.003812,"Tucetona"
3427,"15140AA;Casebolt 33-27",163,0.003816,"Tucetona"
3428,"15140AA;Casebolt 33-27",162.5,0.00382,"Tucetona"
3429,"15140AA;Casebolt 33-27",162,0.003827,"Tucetona"
3430,"15140AA;Casebolt 33-27",161.5,0.003838,"Tucetona"
3431,"15140AA;Casebolt 33-27",161,0.003856,"Tucetona"
3432,"15140AA;Casebolt 33-27",160.5,0.00388,"Tucetona"
3433,"15140AA;Casebolt 33-27",160,0.003909,"Tucetona"
3434,"15140AA;Casebolt 33-27",159.5,0.003941,"Tucetona"
3435,"15140AA;Casebolt 33-27",159,0.003975,"Tucetona"
3436,"15140AA;Casebolt 33-27",158.5,0.00401,"Tucetona"
3437,"15140AA;Casebolt 33-27",158,0.004046,"Tucetona"
3438,"15140AA;Casebolt 33-27",157.5,0.004081,"Tucetona"
3439,"15140AA;Casebolt 33-27",157,0.004114,"Tucetona"
3440,"15140AA;Casebolt 33-27",156.5,0.004145,"Tucetona"
3441,"15140AA;Casebolt 33-27",156,0.004171,"Tucetona"
3442,"15140AA;Casebolt 33-27",155.5,0.004193,"Tucetona"
3443,"15140AA;Casebolt 33-27",155,0.004212,"Tucetona"
3444,"15140AA;Casebolt 33-27",154.5,0.004227,"Tucetona"
3445,"15140AA;Casebolt 33-27",154,0.00424,"Tucetona"
3446,"15140AA;Casebolt 33-27",153.5,0.004253,"Tucetona"
3447,"15140AA;Casebolt 33-27",153,0.004265,"Tucetona"
3448,"15140AA;Casebolt 33-27",152.5,0.004279,"Tucetona"
3449,"15140AA;Casebolt 33-27",152,0.004294,"Tucetona"
3450,"15140AA;Casebolt 33-27",151.5,0.004313,"Tucetona"
3451,"15140AA;Casebolt 33-27",151,0.004336,"Tucetona"
3452,"15140AA;Casebolt 33-27",150.5,0.004362,"Tucetona"
3453,"15140AA;Casebolt 33-27",150,0.004389,"Tucetona"
3454,"15140AA;Casebolt 33-27",149.5,0.004419,"Tucetona"
3455,"15140AA;Casebolt 33-27",149,0.00445,"Tucetona"
3456,"15140AA;Casebolt 33-27",148.5,0.004483,"Tucetona"
3457,"15140AA;Casebolt 33-27",148,0.004518,"Tucetona"
3458,"15140AA;Casebolt 33-27",147.5,0.004556,"Tucetona"
3459,"15140AA;Casebolt 33-27",147,0.004595,"Tucetona"
3460,"15140AA;Casebolt 33-27",146.5,0.004636,"Tucetona"
3461,"15140AA;Casebolt 33-27",146,0.004679,"Tucetona"
3462,"15140AA;Casebolt 33-27",145.5,0.004725,"Tucetona"
3463,"15140AA;Casebolt 33-27",145,0.004777,"Tucetona"
3464,"15140AA;Casebolt 33-27",144.5,0.004831,"Tucetona"
3465,"15140AA;Casebolt 33-27",144,0.004889,"Tucetona"
3466,"15140AA;Casebolt 33-27",143.5,0.004948,"Tucetona"
3467,"15140AA;Casebolt 33-27",143,0.005008,"Tucetona"
3468,"15140AA;Casebolt 33-27",142.5,0.005067,"Tucetona"
3469,"15140AA;Casebolt 33-27",142,0.005124,"Tucetona"
3470,"15140AA;Casebolt 33-27",141.5,0.005178,"Tucetona"
3471,"15140AA;Casebolt 33-27",141,0.005229,"Tucetona"
3472,"15140AA;Casebolt 33-27",140.5,0.005272,"Tucetona"
3473,"15140AA;Casebolt 33-27",140,0.005308,"Tucetona"
3474,"15140AA;Casebolt 33-27",139.5,0.00534,"Tucetona"
3475,"15140AA;Casebolt 33-27",139,0.005369,"Tucetona"
3476,"15140AA;Casebolt 33-27",138.5,0.005397,"Tucetona"
3477,"15140AA;Casebolt 33-27",138,0.005428,"Tucetona"
3478,"15140AA;Casebolt 33-27",137.5,0.005463,"Tucetona"
3479,"15140AA;Casebolt 33-27",137,0.005505,"Tucetona"
3480,"15140AA;Casebolt 33-27",136.5,0.005556,"Tucetona"
3481,"15140AA;Casebolt 33-27",136,0.005619,"Tucetona"
3482,"15140AA;Casebolt 33-27",135.5,0.005697,"Tucetona"
3483,"15140AA;Casebolt 33-27",135,0.005789,"Tucetona"
3484,"15140AA;Casebolt 33-27",134.5,0.005893,"Tucetona"
3485,"15140AA;Casebolt 33-27",134,0.006004,"Tucetona"
3486,"15140AA;Casebolt 33-27",133.5,0.006122,"Tucetona"
3487,"15140AA;Casebolt 33-27",133,0.006242,"Tucetona"
3488,"15140AA;Casebolt 33-27",132.5,0.006362,"Tucetona"
3489,"15140AA;Casebolt 33-27",132,0.006477,"Tucetona"
3490,"15140AA;Casebolt 33-27",131.5,0.006585,"Tucetona"
3491,"15140AA;Casebolt 33-27",131,0.006682,"Tucetona"
3492,"15140AA;Casebolt 33-27",130.5,0.006765,"Tucetona"
3493,"15140AA;Casebolt 33-27",130,0.006839,"Tucetona"
3494,"15140AA;Casebolt 33-27",129.5,0.006905,"Tucetona"
3495,"15140AA;Casebolt 33-27",129,0.006966,"Tucetona"
3496,"15140AA;Casebolt 33-27",128.5,0.007024,"Tucetona"
3497,"15140AA;Casebolt 33-27",128,0.007083,"Tucetona"
3498,"15140AA;Casebolt 33-27",127.5,0.007144,"Tucetona"
3499,"15140AA;Casebolt 33-27",127,0.007212,"Tucetona"
3500,"15140AA;Casebolt 33-27",126.5,0.007289,"Tucetona"
3501,"15140AA;Casebolt 33-27",126,0.007377,"Tucetona"
3502,"15140AA;Casebolt 33-27",125.5,0.007477,"Tucetona"
3503,"15140AA;Casebolt 33-27",125,0.007584,"Tucetona"
3504,"15140AA;Casebolt 33-27",124.5,0.007697,"Tucetona"
3505,"15140AA;Casebolt 33-27",124,0.007817,"Tucetona"
3506,"15140AA;Casebolt 33-27",123.5,0.007943,"Tucetona"
3507,"15140AA;Casebolt 33-27",123,0.008073,"Tucetona"
3508,"15140AA;Casebolt 33-27",122.5,0.008208,"Tucetona"
3509,"15140AA;Casebolt 33-27",122,0.008346,"Tucetona"
3510,"15140AA;Casebolt 33-27",121.5,0.008488,"Tucetona"
3511,"15140AA;Casebolt 33-27",121,0.008631,"Tucetona"
3512,"15140AA;Casebolt 33-27",120.5,0.00878,"Tucetona"
3513,"15140AA;Casebolt 33-27",120,0.008936,"Tucetona"
3514,"15140AA;Casebolt 33-27",119.5,0.009099,"Tucetona"
3515,"15140AA;Casebolt 33-27",119,0.009267,"Tucetona"
3516,"15140AA;Casebolt 33-27",118.5,0.009438,"Tucetona"
3517,"15140AA;Casebolt 33-27",118,0.009611,"Tucetona"
3518,"15140AA;Casebolt 33-27",117.5,0.009783,"Tucetona"
3519,"15140AA;Casebolt 33-27",117,0.009954,"Tucetona"
3520,"15140AA;Casebolt 33-27",116.5,0.010121,"Tucetona"
3521,"15140AA;Casebolt 33-27",116,0.010283,"Tucetona"
3522,"15140AA;Casebolt 33-27",115.5,0.010444,"Tucetona"
3523,"15140AA;Casebolt 33-27",115,0.01061,"Tucetona"
3524,"15140AA;Casebolt 33-27",114.5,0.010777,"Tucetona"
3525,"15140AA;Casebolt 33-27",114,0.010944,"Tucetona"
3526,"15140AA;Casebolt 33-27",113.5,0.011107,"Tucetona"
3527,"15140AA;Casebolt 33-27",113,0.011263,"Tucetona"
3528,"15140AA;Casebolt 33-27",112.5,0.01141,"Tucetona"
3529,"15140AA;Casebolt 33-27",112,0.011545,"Tucetona"
3530,"15140AA;Casebolt 33-27",111.5,0.011665,"Tucetona"
3531,"15140AA;Casebolt 33-27",111,0.011767,"Tucetona"
3532,"15140AA;Casebolt 33-27",110.5,0.011848,"Tucetona"
3533,"15140AA;Casebolt 33-27",110,0.011911,"Tucetona"
3534,"15140AA;Casebolt 33-27",109.5,0.011958,"Tucetona"
3535,"15140AA;Casebolt 33-27",109,0.011992,"Tucetona"
3536,"15140AA;Casebolt 33-27",108.5,0.012016,"Tucetona"
3537,"15140AA;Casebolt 33-27",108,0.012032,"Tucetona"
3538,"15140AA;Casebolt 33-27",107.5,0.012043,"Tucetona"
3539,"15140AA;Casebolt 33-27",107,0.012052,"Tucetona"
3540,"15140AA;Casebolt 33-27",106.5,0.012061,"Tucetona"
3541,"15140AA;Casebolt 33-27",106,0.012074,"Tucetona"
3542,"15140AA;Casebolt 33-27",105.5,0.012086,"Tucetona"
3543,"15140AA;Casebolt 33-27",105,0.012093,"Tucetona"
3544,"15140AA;Casebolt 33-27",104.5,0.012096,"Tucetona"
3545,"15140AA;Casebolt 33-27",104,0.012096,"Tucetona"
3546,"15140AA;Casebolt 33-27",103.5,0.012093,"Tucetona"
3547,"15140AA;Casebolt 33-27",103,0.012089,"Tucetona"
3548,"15140AA;Casebolt 33-27",102.5,0.012083,"Tucetona"
3549,"15140AA;Casebolt 33-27",102,0.012079,"Tucetona"
3550,"15140AA;Casebolt 33-27",101.5,0.012075,"Tucetona"
3551,"15140AA;Casebolt 33-27",101,0.012074,"Tucetona"
3552,"15140AA;Casebolt 33-27",100.5,0.012078,"Tucetona"
3553,"15140AA;Casebolt 33-27",100,0.012089,"Tucetona"
3554,"15140AA;Casebolt 33-27",99.5,0.012103,"Tucetona"
3555,"15140AA;Casebolt 33-27",99,0.012118,"Tucetona"
3556,"15140AA;Casebolt 33-27",98.5,0.012132,"Tucetona"
3557,"15140AA;Casebolt 33-27",98,0.01214,"Tucetona"
3558,"15140AA;Casebolt 33-27",97.5,0.012142,"Tucetona"
3559,"15140AA;Casebolt 33-27",97,0.012133,"Tucetona"
3560,"15140AA;Casebolt 33-27",96.5,0.012111,"Tucetona"
3561,"15140AA;Casebolt 33-27",96,0.012074,"Tucetona"
3562,"15140AA;Casebolt 33-27",95.5,0.012017,"Tucetona"
3563,"15140AA;Casebolt 33-27",95,0.011943,"Tucetona"
3564,"15140AA;Casebolt 33-27",94.5,0.011855,"Tucetona"
3565,"15140AA;Casebolt 33-27",94,0.011757,"Tucetona"
3566,"15140AA;Casebolt 33-27",93.5,0.011652,"Tucetona"
3567,"15140AA;Casebolt 33-27",93,0.011545,"Tucetona"
3568,"15140AA;Casebolt 33-27",92.5,0.011439,"Tucetona"
3569,"15140AA;Casebolt 33-27",92,0.011338,"Tucetona"
3570,"15140AA;Casebolt 33-27",91.5,0.011244,"Tucetona"
3571,"15140AA;Casebolt 33-27",91,0.011163,"Tucetona"
3572,"15140AA;Casebolt 33-27",90.5,0.011093,"Tucetona"
3573,"15140AA;Casebolt 33-27",90,0.011034,"Tucetona"
3574,"15140AA;Casebolt 33-27",89.5,0.010981,"Tucetona"
3575,"15140AA;Casebolt 33-27",89,0.010932,"Tucetona"
3576,"15140AA;Casebolt 33-27",88.5,0.010884,"Tucetona"
3577,"15140AA;Casebolt 33-27",88,0.010835,"Tucetona"
3578,"15140AA;Casebolt 33-27",87.5,0.010782,"Tucetona"
3579,"15140AA;Casebolt 33-27",87,0.010722,"Tucetona"
3580,"15140AA;Casebolt 33-27",86.5,0.010653,"Tucetona"
3581,"15140AA;Casebolt 33-27",86,0.010572,"Tucetona"
3582,"15140AA;Casebolt 33-27",85.5,0.010478,"Tucetona"
3583,"15140AA;Casebolt 33-27",85,0.010373,"Tucetona"
3584,"15140AA;Casebolt 33-27",84.5,0.010258,"Tucetona"
3585,"15140AA;Casebolt 33-27",84,0.010138,"Tucetona"
3586,"15140AA;Casebolt 33-27",83.5,0.010015,"Tucetona"
3587,"15140AA;Casebolt 33-27",83,0.009891,"Tucetona"
3588,"15140AA;Casebolt 33-27",82.5,0.009768,"Tucetona"
3589,"15140AA;Casebolt 33-27",82,0.009651,"Tucetona"
3590,"15140AA;Casebolt 33-27",81.5,0.00954,"Tucetona"
3591,"15140AA;Casebolt 33-27",81,0.009438,"Tucetona"
3592,"15140AA;Casebolt 33-27",80.5,0.009346,"Tucetona"
3593,"15140AA;Casebolt 33-27",80,0.00926,"Tucetona"
3594,"15140AA;Casebolt 33-27",79.5,0.00918,"Tucetona"
3595,"15140AA;Casebolt 33-27",79,0.009104,"Tucetona"
3596,"15140AA;Casebolt 33-27",78.5,0.00903,"Tucetona"
3597,"15140AA;Casebolt 33-27",78,0.008956,"Tucetona"
3598,"15140AA;Casebolt 33-27",77.5,0.00888,"Tucetona"
3599,"15140AA;Casebolt 33-27",77,0.008802,"Tucetona"
3600,"15140AA;Casebolt 33-27",76.5,0.00872,"Tucetona"
3601,"15140AA;Casebolt 33-27",76,0.008631,"Tucetona"
3602,"15140AA;Casebolt 33-27",75.5,0.008538,"Tucetona"
3603,"15140AA;Casebolt 33-27",75,0.008444,"Tucetona"
3604,"15140AA;Casebolt 33-27",74.5,0.008347,"Tucetona"
3605,"15140AA;Casebolt 33-27",74,0.008248,"Tucetona"
3606,"15140AA;Casebolt 33-27",73.5,0.008147,"Tucetona"
3607,"15140AA;Casebolt 33-27",73,0.008045,"Tucetona"
3608,"15140AA;Casebolt 33-27",72.5,0.007941,"Tucetona"
3609,"15140AA;Casebolt 33-27",72,0.007835,"Tucetona"
3610,"15140AA;Casebolt 33-27",71.5,0.007728,"Tucetona"
3611,"15140AA;Casebolt 33-27",71,0.007619,"Tucetona"
3612,"15140AA;Casebolt 33-27",70.5,0.007616,"Tucetona"
3613,"15140AA;Casebolt 33-27",70,0.007783,"Tucetona"
3614,"15140AA;Casebolt 33-27",69.5,0.008053,"Tucetona"
3615,"15140AA;Casebolt 33-27",69,0.008357,"Tucetona"
3616,"15140AA;Casebolt 33-27",68.5,0.008615,"Tucetona"
3617,"15140AA;Casebolt 33-27",68,0.008739,"Tucetona"
3618,"15140AA;Casebolt 33-27",67.5,0.00864,"Tucetona"
3619,"15140AA;Casebolt 33-27",67,0.008243,"Tucetona"
3620,"15140AA;Casebolt 33-27",66.5,0.007509,"Tucetona"
3621,"15140AA;Casebolt 33-27",66,0.006459,"Tucetona"
3622,"15140AA;Casebolt 33-27",65.5,0.0010116,"Tucetona"
3623,"15140AA;Casebolt 33-27",65,0.0008608,"Tucetona"
3624,"15140AA;Casebolt 33-27",64.5,0.0007295,"Tucetona"
3625,"15140AA;Casebolt 33-27",64,0.0027868,"Tucetona"
3626,"15140AA;Casebolt 33-27",63.5,0.007692,"Tucetona"
3627,"15140AA;Casebolt 33-27",63,0.010475,"Tucetona"
3628,"15140AA;Casebolt 33-27",62.5,0.013556,"Tucetona"
3629,"15140AA;Casebolt 33-27",62,0.008943,"Tucetona"
3630,"15140AA;Casebolt 33-27",61.5,0.005234,"Tucetona"
3631,"15140AA;Casebolt 33-27",61,0.009648,"Tucetona"
3632,"15140AA;Casebolt 33-27",60.5,0.015125,"Tucetona"
3633,"15140AA;Casebolt 33-27",60,0.01561,"Tucetona"
3634,"15140AA;Casebolt 33-27",59.5,0.01609,"Tucetona"
3635,"15140AA;Casebolt 33-27",59,0.020664,"Tucetona"
3636,"15140AA;Casebolt 33-27",58.5,0.022803,"Tucetona"
3637,"15140AA;Casebolt 33-27",58,0.008445,"Tucetona"
3638,"15140AA;Casebolt 33-27",57.5,0.0003468,"Tucetona"
3639,"15140AA;Casebolt 33-27",57,3.398e-05,"Tucetona"
3640,"15140AA;Casebolt 33-27",56.5,1.961e-06,"Tucetona"
3641,"15140AA;Casebolt 33-27",56,2.74e-07,"Tucetona"
3642,"15140AA;Casebolt 33-27",55.5,2.28e-08,"Tucetona"
3647,"15140AC;Casebolt 33-29",358.5,2.02e-08,"Tucetona"
3648,"15140AC;Casebolt 33-29",358,2.02e-08,"Tucetona"
3649,"15140AC;Casebolt 33-29",357.5,2.02e-08,"Tucetona"
3650,"15140AC;Casebolt 33-29",357,2.02e-08,"Tucetona"
3651,"15140AC;Casebolt 33-29",356.5,2.02e-08,"Tucetona"
3652,"15140AC;Casebolt 33-29",356,2.02e-08,"Tucetona"
3653,"15140AC;Casebolt 33-29",355.5,4.05e-08,"Tucetona"
3654,"15140AC;Casebolt 33-29",355,4.05e-08,"Tucetona"
3655,"15140AC;Casebolt 33-29",354.5,4.05e-08,"Tucetona"
3656,"15140AC;Casebolt 33-29",354,4.05e-08,"Tucetona"
3657,"15140AC;Casebolt 33-29",353.5,4.05e-08,"Tucetona"
3658,"15140AC;Casebolt 33-29",353,4.05e-08,"Tucetona"
3659,"15140AC;Casebolt 33-29",352.5,6.07e-08,"Tucetona"
3660,"15140AC;Casebolt 33-29",352,6.07e-08,"Tucetona"
3661,"15140AC;Casebolt 33-29",351.5,6.07e-08,"Tucetona"
3662,"15140AC;Casebolt 33-29",351,6.07e-08,"Tucetona"
3663,"15140AC;Casebolt 33-29",350.5,8.09e-08,"Tucetona"
3664,"15140AC;Casebolt 33-29",350,8.09e-08,"Tucetona"
3665,"15140AC;Casebolt 33-29",349.5,1.01e-07,"Tucetona"
3666,"15140AC;Casebolt 33-29",349,1.01e-07,"Tucetona"
3667,"15140AC;Casebolt 33-29",348.5,1.01e-07,"Tucetona"
3668,"15140AC;Casebolt 33-29",348,1.21e-07,"Tucetona"
3669,"15140AC;Casebolt 33-29",347.5,1.42e-07,"Tucetona"
3670,"15140AC;Casebolt 33-29",347,1.42e-07,"Tucetona"
3671,"15140AC;Casebolt 33-29",346.5,1.62e-07,"Tucetona"
[truncated: 5,969 more rows]
