# Supplementary material
Source: publisher figshare collection journal article supplement (https://gsapubs.figshare.com/ndownloader/files/23306579)
Supplement: Supplementary file 1 [file 23306579 › Appendix DR3 R Script.docx]

################################ FILE LICENSE ################################

#

# This file is copyright (C) 2017 Matthew Kosnik & Michal Kowalewski

#

# This program is free software; you can redistribute it and/or modify it

# under the terms of version 2 the GNU General Public License as published

# by the Free Software Foundation.

#

# This program is distributed in the hope that it will be useful, but WITHOUT

# ANY WARRANTY; without even the implied warranty of MERCHANTABILITY or

# FITNESS FOR A PARTICULAR PURPOSE. See the GNU General Public License for

# more details.

#

# To view a copy of the license go to:

# http://www.fsf.org/copyleft/gpl.html

# To receive a copy of the GNU General Public License write the Free Software

# Foundation, Inc., 59 Temple Place - Suite 330, Boston, MA 02111-1307, USA.

#

################################################################################

############################ ABOUT THESE ANALYSES ############################

#

# This file was used to generate Figures and analyses in the following paper:

#

#

#

#

#

# doi:

#

# Matthew Kosnik: mkosnik@alumni.uchicago.edu

# Michal Kowalewski: mkowalewski@ufl.edu

#

# This is the version is current as of the time stamp above, but you are

# encouraged to contact the authors to obtain the most recent version.

#

# If something in this file is useful to you... please use it, please cite the

# original work, and feel free to contact us should you have any questions.

#

################################################################################

## GEOLOGY COLUMN / PAGE SIZES

pageWidthOne <- 2.33

pageWidthTwo <- 3.5

pageWidthFull <- 7.125

pageHeight <- 9.5

fontFamily <- 'Helvetica'

pdf.options(paper="special", onefile=TRUE, family=fontFamily, pointsize=10, encoding="ISOLatin1.enc", height=pageHeight, width=pageWidthFull)

par(mar=c(3,3,2,0), las=0, mgp=c(2,1,0))

## LOAD SUMMARY DATA

fdata <- read.csv("./Appendix DR1-dataSummaryTable.csv", header=TRUE, strip.white=TRUE, as.is=TRUE, skip=20)

ldata <- fdata[(fdata$taxon=='Leodia'),]

tdata <- fdata[(fdata$taxon=='Tucetona'),]

#--- frequency of pre-bomb and post-bomb shells

bombgp <- ifelse(fdata$carbonateAge<0, bombg <- 1, bombgp <- 0)

bmbtb <- table(bombgp, fdata$taxon)

fisher.test(bmbtb)

#--- summary of descriptive statistics (Table DR4)

skew.F <- function(x) (length(x)/((length(x)-1)*(length(x)-2)))*sum((x-mean(x))^3)/sd(x)^3

st.F <- function(x) c(n=length(x), mean=mean(x), median=median(x), std=sd(x),

range=max(x)-min(x), youngest=min(x), oldest=max(x),

iqr=IQR(x), skew.F(x))

tab1 <-(cbind("echinoids"=st.F(ldata$medianAge), "mollusks"=st.F(tdata$medianAge)))

table1 <- rbind(tab1, 'pre-bomb'=bmbtb[1,], 'post-bomb'=bmbtb[2,])

rownames(table1) <- c('number of specimens', 'mean age',

'median age', 'standard deviation',

'range', 'minimum age', 'maximum age',

'inter-quartile range', 'skewness',

'number of pre-bomb specimens', 'number of post-bomb specimens')

table1

write.csv(table1, 'Table1.csv')

# Assessment of carbonate-target AMS dates

L2 <- fdata[!is.na(fdata$graphiteAge),] # restrict data to standard/graphite AMS dates

# reduced major regression (naive percentile bootstrap)

sRMA <- function(X,Y) sign(cov(X,Y))*sd(Y)/sd(X)

iRMA <- function(X,Y) mean(Y)-sign(cov(X,Y))*sd(Y)/sd(X)*mean(X)

boot1 <- function(X,Y) {

rs <- sample(1:length(X),replace=T)

c(sRMA(X[rs],Y[rs]),iRMA(X[rs],Y[rs]))

}

iter <- 10000 # set number of bootstrap iterations

out1 <- t(replicate(iter + 1000, boot1(L2$graphiteAge, L2$carbonateAge)))

out1 <- na.omit(out1)[1:iter,]

p1 <- round(sum(out1[,1]<=1)/length(out1),log(iter,10))

p2 <- round(sum(out1[,2]>=0)/length(out1),log(iter, 10))

#------ FIGURE 1

pdf("Figure1.pdf", width = pageWidthTwo, height = pageWidthTwo)

col.m <- 'black'

col.e <- 'blue3'

op <- par(mar=c(2,1,0,0), omi=c(0.35,0.5,0.1,0.1))

plot(L2$graphiteAge, L2$carbonateAge, type='n', xlab='', ylab='', axes=F)

abline(a=iRMA(L2$graphiteAge,L2$carbonateAge), b=sRMA(L2$graphiteAge,L2$carbonateAge), col='black')

abline(a=0, b=1, col='red1', lty=2)

points(L2$graphiteAge,L2$carbonateAge, pch=21, bg=c(col.e, rep(col.m,3)), cex=1.8, col='white')

for (i in 1:nrow(L2)) {

points(rep(L2$graphiteAge[i],2),c(L2$carbonateAge[i]+2*L2$carbonateErr[i],L2$carbonateAge[i]-2*L2$carbonateErr[i]), type='l', col='white', lend=3, lwd=0.7)

points(c(L2$graphiteAge[i]+2*L2$graphiteErr[i],L2$graphiteAge[i]-2*L2$graphiteErr[i]), rep(L2$carbonateAge[i],2),type='l', col='white', lend=3, lwd=0.7)

}

axis(1, padj=-0.6, cex.axis=0.9, at=c(0,1000,2000,3000,4000), label=c(0,1,2,3,4))

axis(2, hadj=0.8, las=1, cex.axis=0.9, at=c(0,1000,2000,3000,4000), label=c(0,1,2,3,4))

mtext(side=1, line=2, 'graphite target (kyr BP)')

mtext(side=2, line=2, 'carbonate target (kyr BP)')

mtext(side=3, line=-1.5, cex=0.9, adj=0.05, bquote(r^2 == .(round(cor(L2$carbonateAge, L2$graphiteAge)^2,4))))

legend('bottomright', pch=16, cex=0.9, col=c(col.e, col.m), c('echinoid', 'mollusk'), pt.cex=1.8)

points(c(-400,150),c(3200,3200), type='l', col='red1', lty=2, lend=3)

points(c(-400,150),c(3550,3550), type='l', lend=3)

text(100,3200, 'x=y line', col='red1', cex=0.9, pos=4)

text(100,3550, 'RMA line', col='black', cex=0.9, pos=4)

box()

par(op)

dev.off()

#------ FIGURE DR1

pdf("FigureDR1.pdf", width = pageWidthTwo, height = pageWidthTwo*3/2)

op <- par(mfrow=c(2,1), mar=c(2,2,1,0), omi=c(0.3,0.5,0.1,0.1))

a <- hist(out1[,1], breaks=seq(0.9,1.1,0.005), col='black', border='black', axes=F, main='', xlab='', ylab='')

axis(1, tck=-.035, padj=-0.9, cex.axis=0.9, at=seq(0.9, 1.1, 0.05), label=seq(0.9,1.1,0.05))

axis(2, las=1, tck=-.05, cex.axis=0.9, hadj=1)

mtext(side=1, line=1.4, cex=0.9, 'slope coefficient')

mtext(side=2, line=3.2, cex=0.9, 'number of replicate samples')

mtext(side=3, line=-1, cex=0.9, adj=1, paste('p = ', p1, sep=''))

text(min(a$breaks), max(a$counts)*0.95, LETTERS[1], cex=2, pos=4)

b <- hist(out1[,2], breaks=seq(-100,100,5), col='black', border='black',

axes=F, main='', xlab='', ylab='')

axis(1, tck=-.035, padj=-0.9, cex.axis=0.9,

at=c(-100, -50, 0, 50, 100), label=c('-100','-50','0','50','100'))

axis(2, las=1, tck=-.05, cex.axis=0.9, hadj=1)

mtext(side=1, line=1.3, cex=0.9, 'intercept coefficient')

mtext(side=2, line=3.2, cex=0.9, 'number of replicate samples')

mtext(side=3, line=-1, cex=0.9, adj=1, paste('p = ', p2, sep=''))

text(min(b$breaks), max(b$counts)*0.95, LETTERS[2], cex=2, pos=4)

par(op)

dev.off()

## READ CARBON AGE POSTERIORS

useMe <- read.csv("./Appendix DR2-dataPosteriorDistributions.csv", header=TRUE, as.is=TRUE, skip=20)

## SUMMARY

taxa <- unique(useMe$Taxon)

length(taxa)

specNames <- unique(useMe$Specimen)

length(specNames)

## check for specimens in summary table but not with posteriors

fdata[!(fdata$sample %in% specNames),]

## check for specimens with posteriors but not in table

specNames[!(specNames %in% fdata$sample)]

useLeo <- useMe[(useMe$Taxon == 'Leodia'),]

length(unique(useLeo$Specimen))

useTuc <- useMe[(useMe$Taxon == 'Tucetona'),]

length(unique(useTuc$Specimen))

## COMBINED PROBABLITY DISTRIBUTIONS

comProb <- aggregate(useMe[,c('Probability')],by=list(useMe$Taxon, useMe$Age), FUN=sum)

colnames(comProb) <- c('Taxon','Age','Probability')

comLeo <- comProb[comProb$Taxon == 'Leodia',]

comLeo$Probability <- comLeo$Probability/sum(comLeo$Probability)

comLeo$cumProb <- cumsum(comLeo$Probability)

comTuc <- comProb[comProb$Taxon == 'Tucetona',]

comTuc$Probability <- comTuc$Probability/sum(comTuc$Probability)

comTuc$cumProb <- cumsum(comTuc$Probability)

#######################################################################################################

individualHistograms <- function(agePosterior,xCol,yCol,sCol, maxProb, ageRange, panelLabel, xlab, ylab, tCol) {

if (missing(maxProb))

maxProb <- max(agePosterior[,yCol])*1.05

if (missing(ageRange))

ageRange <- rev(range(agePosterior[,xCol]))

if (missing(ylab))

ylab <- 'probability'

if (missing(xlab))

xlab <- 'age (yr)'

if (missing(tCol))

tCol <- rgb(0,0,0.1,0.1)

splits <- unique(agePosterior[,sCol])

yMin <- -1 * maxProb * 0.05

plot(1:1, type='n', ylim=c(yMin, maxProb), xlim=(ageRange), xlab=xlab, ylab=ylab, las=1, yaxs='i', bty='l')

segments(ageRange[1],0,ageRange[2],0)

for (s in splits) {

splitPosterior <- agePosterior[(agePosterior[,sCol] == s),]

splitPosterior[,yCol] <- splitPosterior[,yCol] / sum(splitPosterior[,yCol])

splitPosterior$cumPost <- cumsum(splitPosterior[,yCol])

polygon(c(min(splitPosterior[,xCol])-1,splitPosterior[,xCol],max(splitPosterior[,xCol])+1), c(0,splitPosterior[,yCol],0), col=rgb(tCol[1],tCol[2],tCol[3],0.1), border=rgb(tCol[1],tCol[2],tCol[3],1), lty=1, lwd=0.5)

mid <- splitPosterior[(splitPosterior$cumPost>0.5),]

points(mid[1,xCol], yMin*.6, pch=24, bg= rgb(tCol[1],tCol[2],tCol[3],1), col='white', lwd=1)

}

if (!missing(panelLabel))

text(ageRange[1], maxProb*0.95, panelLabel, cex=2, pos=4)

return('individual histogram plotted')

}

#######################################################################################################

combinedHistograms <- function(ages, xlim, panelLabel, xlab, ylab, tCol) {

minAge <- floor(min(ages$Age))

maxAge <- ceiling(max(ages$Age))

maxProb <- (max(ages$Probability))

if (missing(ylab))

ylab <- 'probability'

if (missing(xlab))

xlab <- 'age (yr)'

if (missing(xlim))

xlim <- c(minAge, maxAge)

if (missing(tCol))

tCol <- rgb(0,0,0.2,0.4)

plot(0:0,type='n', xlim=xlim, ylim=c(0,maxProb), bty='l', xlab=xlab, ylab=ylab)

polygon(c(minAge,ages$Age,maxAge),c(0,ages$Prob,0), col=rgb(tCol[1],tCol[2],tCol[3],0.2), lty=0.1)

lines(ages$Age,ages$Prob, col= rgb(tCol[1],tCol[2],tCol[3],1), lty=1, lwd=0.5)

iqAges <- ages[(ages$cumProb > 0.25) & (ages$cumProb < 0.75),]

iqRange <- range(iqAges$Age)

polygon(c(iqRange[1],iqAges$Age,iqRange[2]),c(0,iqAges$Prob,0), col= rgb(tCol[1],tCol[2],tCol[3],0.2), lty=0.1, border= rgb(tCol[1],tCol[2],tCol[3],1))

medAge <- ages[ages$cumProb >= 0.5,]

segments(medAge[1,'Age'],medAge[1,'Probability'],medAge[1,'Age'],-1*medAge[1,'Probability'], lwd=1, col= rgb(tCol[1],tCol[2],tCol[3],1))

if (!missing(panelLabel))

text(xlim[1], maxProb*0.95, panelLabel, cex=2, pos=4)

return('combined histogram plotted')

}

bCol <- t(col2rgb('black'))/255

eCol <- t(col2rgb('blue3'))/255

#######################################################################################################

pdf("./Figure2.pdf", width=pageWidthFull, height= pageWidthFull*(2/3), family=fontFamily)

par(oma=c(1,1,1,1), mar=c(4,5,0,0), las=1, bty='l', xaxs='i', yaxs='i', mgp=c(2.75,1,0), cex=1)

par(mfcol=c(2,3))

xLimit <- c(4600,0)

aa <- hist((tdata$medianAge), breaks=seq(0,4400,by=100), col= rgb(bCol[1],bCol[2],bCol[3],1), xlim= xLimit, ylab='', xlab='', las=1, main='')

text(xLimit[1], max(aa$counts)*0.95, LETTERS[1], cex=2, pos=4)

text(xLimit[1], max(aa$counts)*0.8, 'mollusks', cex=1.8, font=1, pos=4)

mtext('number of specimens',side=2,line=3.7, las=3)

mtext('(100 yr bins)',side=2,line=2.3, las=3, cex=0.85)

aa <- hist((ldata$medianAge), breaks=seq(0,4400,by=100), col= rgb(eCol[1],eCol[2],eCol[3],1), border=rgb(eCol[1],eCol[2],eCol[3],1), xlim= xLimit, ylab='', xlab='', las=1, main='')

text(xLimit[1], max(aa$counts)*0.95, LETTERS[2], cex=2, pos=4)

text(xLimit[1], max(aa$counts)*0.8, 'echinoids', cex=1.8, font=1, pos=4)

mtext('number of specimens',side=2,line=3.7, las=3)

mtext('(100 yr bins)',side=2,line=2.3, las=3, cex=0.85)

mtext('median probability age (yr)',side=1,line=3, las=1)

individualHistograms(useTuc,'Age','Probability','Specimen',0.075, xLimit, LETTERS[3], xlab='', ylab='', tCol=bCol)

mtext('annual probability',side=2,line=2.9, las=3)

individualHistograms(useLeo,'Age','Probability','Specimen',0.14, xLimit, LETTERS[4], xlab='', ylab='', tCol=eCol)

mtext('annual probability',side=2,line=2.9, las=3)

mtext('age (yr)',side=1,line=3, las=1)

combinedHistograms(comTuc, xLimit, LETTERS[5], xlab='', ylab='', tCol=bCol)

combinedHistograms(comLeo, xLimit, LETTERS[6], ylab='', xlab='', tCol=eCol)

mtext('age (yr)',side=1,line=3, las=1)

dev.off()

pdf("./FigureDR2.pdf", width=pageWidthTwo, height= pageWidthTwo*(2), family=fontFamily)

par(oma=c(1,1,1,1), mar=c(3,3.5,0,0), las=1, bty='l', xaxs='i', yaxs='i', mgp=c(2.75,1,0), cex=1)

par(mfcol=c(2,1))

xLimit <- c(60,0)

individualHistograms(useLeo,'Age','Probability','Specimen',0.14, xLimit, LETTERS[1], xlab='', ylab='', tCol=eCol)

mtext('probability',side=2,line=3, las=3)

combinedHistograms(comLeo, xLimit, LETTERS[2], xlab='', ylab='', tCol=eCol)

mtext('probability',side=2,line=3, las=3)

mtext('age (yr)',side=1,line=2, las=1)

dev.off()

quantile(ldata$medianAge,c(0,0.25,0.5,0.75,1))

quantile(tdata$medianAge,c(0,0.25,0.5,0.75,1))

IQR(ldata$medianAge)

IQR(tdata$medianAge)

#source("../../bayesianCalibration/functions-timeAveraging.R")

#######################################################################################################

c14AgesFromPosterior <- function(c14probs, reps) {

# specimens

c14specs <- sort(unique(c14probs$Specimen))

# so that they are integer years

c14probs$Age <- ceiling(c14probs$Age)

# summary table

sumTable <- matrix(0, nrow=length(c14specs), ncol=reps)

for (s in 1:length(c14specs)) {

specData <- c14probs[(c14probs$Specimen == c14specs[s]),]

# probabilities sum to 1

specData$Probability <- specData$Probability / sum(specData$Probability)

specData$mc <- round(specData$Probability*reps)

specData <- specData[(specData$mc > 0),]

rAges <- rep(specData$Age,specData$mc)

## if rounding results in not enogh many ages increase the most under represented by one.

while (length(rAges) < reps) {

specData$mc1 <- (specData$Probability*reps)

specData$mcd <- specData$mc - specData$mc1

## avoids particularlly nasty situation when multiple rows match

logRows <- which(specData$mcd == min(specData$mcd))

if (length(logRows) > (reps - length(rAges)))

logRows <- sample(logRows,(reps - length(rAges)))

specData[logRows,'mc'] <- specData[logRows,'mc'] + 1

rAges <- rep(specData$Age,specData$mc)

}

## if rounding results in too many ages decrease the most over represented by one.

while (length(rAges) > reps) {

specData$mc1 <- (specData$Probability*reps)

specData$mcd <- specData$mc - specData$mc1

logRows <- which(specData$mcd == max(specData$mcd))

if (length(logRows) > (length(rAges) - reps))

logRows <- sample(logRows,(length(rAges) - reps))

specData[logRows,'mc'] <- specData[logRows,'mc'] -1

rAges <- rep(specData$Age,specData$mc)

}

# put ages in sumTable

sumTable[s,] <- rAges

}

return(sumTable)

}

#######################################################################################################

# COMBINE ALL THE MCMC TRIALS FROM MULTIPLE SPECIMENS TO GET THE FULL AGE DISTRIBUTION

#

# REQUIRES:

# mcmcAges <- mcmc results

# gList <- list of groups

# gColumn <- which column has the group

# metaCols <- columns with metadata

# RETURNS:

# quantiles of mcmc results by group

#######################################################################################################

getMCMCobsTA <- function(mcmcAges, gList, gColumn, metaCols) {

qp <- c(0,0.025,0.25,0.5,0.75,0.95,0.975,1)

qp <- c(0,0.25,0.5,0.75,1)

sumObse <- as.data.frame(matrix(data=NA, ncol=length(qp)+1, nrow=length(gList)))

for (s in 1:length(gList)) {

mcmcData <- mcmcAges[(mcmcAges[,gColumn] == gList[s]),(length(metaCols)+1):length(mcmcAges)]

mcmcData <- unlist(mcmcData)

aa <- quantile(mcmcData, qp)

sumObse[s,1] <- gList[s]

sumObse[s,(1:length(qp))+1] <- round(aa)

}

colnames(sumObse) <- c(gColumn,names(aa))

return(sumObse)

}

#######################################################################################################

# DETERMINE THE EXTENT OF AGE VARIANCE SIMPLY DUE TO AGE UNCERTAINTY

# DETERMINE THE EXTENT OF AGE VARIANCE DUE TO TIME-AVERAGING

#

# REQUIRES:

# mcmcAges <- mcmc results

# gList <- list of groups

# gColumn <- which column has the group

# metaCols <- columns with metadata

# mList <- vector of observed IQR values

# RETURN:

# - mean, median and 95% specimen IQR age uncertainty

# - residual time-averaging after subtracting the age unceratinty

#######################################################################################################

getMCMCwithinShellTA <- function(mcmcAges, gList, gColumn, metaCols, mList) {

## ONLY MCMC REPLICATE AGES

bob <- mcmcAges[,(length(metaCols)+1):ncol(mcmcAges)]

## GET IQR FROM EACH SHELL'S MCMC REPS

iqr <- apply(as.matrix(bob),MARGIN=1,FUN=IQR)

shellData <- cbind(mcmcAges[,1:length(metaCols)],iqr)

sumCols <- c('oIQR','dMean','d50','d95','mMean','m50','m95')

datingIQR <- matrix(ncol=length(sumCols), nrow=length(mList))

colnames(datingIQR) <- sumCols

## FOR EACH GROUP OF AGES

for (s in 1:length(gList)) {

subSet <- shellData[(shellData[, gColumn]==gList[s]),]

# observed IQR

datingIQR[s,'oIQR'] <- mList[s]

# mean shell IQR / residual time-averaging

datingIQR[s,'dMean'] <- mean(subSet$iqr)

datingIQR[s,'mMean'] <- mList[s] - mean(subSet$iqr)

# 50% & 95% IQR

datingIQR[s,c('d50','d95')] <- quantile(subSet$iqr, c(0.5,0.95))

# 50% & 95% IQR residual time-averaging

datingIQR[s,c('m50','m95')] <- mList[s] - quantile(subSet$iqr, c(0.5,0.95))

}

# round to whole years, cannot be a negative value

datingIQR <- round(datingIQR)

datingIQR[(datingIQR<0)] <- 0

return(datingIQR)

}

metaData <- data.frame(Specimen = specNames)

metaData$Taxon <- NA

for (s in 1:length(specNames))

metaData[s,'Taxon'] <- useMe[(useMe$Specimen == specNames[s]),'Taxon'][1]

metaCols <- names(metaData)

nAges <- 10000

ageDist <- c14AgesFromPosterior(useMe, nAges)

ageDist <- cbind(metaData, ageDist)

Obse <- getMCMCobsTA(ageDist, taxa, 'Taxon', metaCols)

oIQR <- Obse[,'75%'] - Obse[,'25%']

Obse <- cbind(Obse, oIQR)

Unce <- getMCMCwithinShellTA(ageDist, taxa, 'Taxon', metaCols, Obse[,'oIQR'])

Unce

Obse

table1 <- rbind(table1, 'median specimen age variability [IQR]'=c(median(ldata$medianAge),median(tdata$medianAge)))

table1 <- rbind(table1, 'total age variability [IQRTAV]'=Unce[,'oIQR'])

table1 <- rbind(table1, 'median specimen age-uncertainty [IQRAER]'= Unce[,'d50'])

table1 <- rbind(table1, 'corrected posterior estimate [IQRCPE]'=Unce[,'m50'])

roundnames <- !(rownames(table1) %in% c('skewness'))

table1 <- round(table1,3)

write.csv(table1, 'TableDR4.csv')
